# Supplementary material for: Variation in the quality and out-of-pocket cost of treatment for childhood malaria, diarrhoea, and pneumonia: Community and facility based care in rural Uganda
Source: PubMed Central journal article supplement (PMC6261061; doi:10.1371/journal.pone.0200543), 2018-11-26

survey Drug Picture Cards.

Metronidazole/Flagyl (D1)

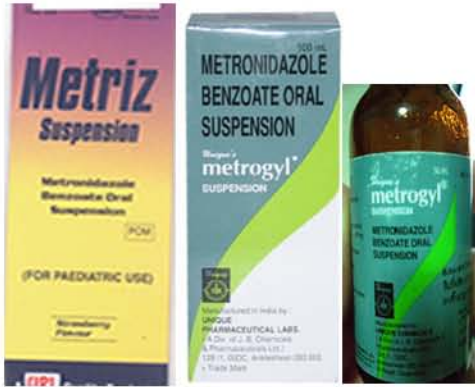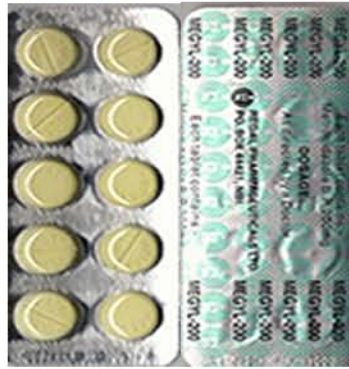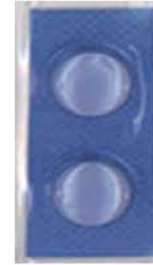

ORS (D2)

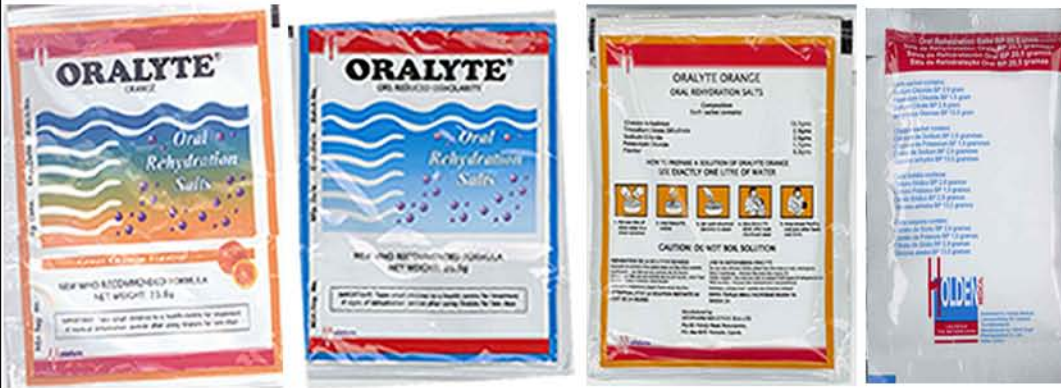

ZINC (D3)

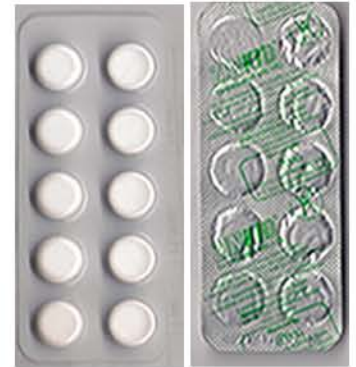

Deworming tablets

Levamisole (D4)

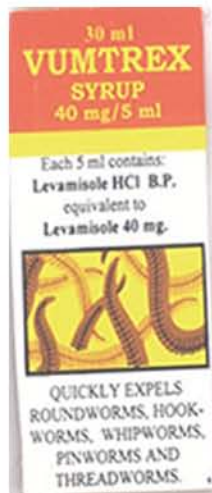

Albendazole (D5)

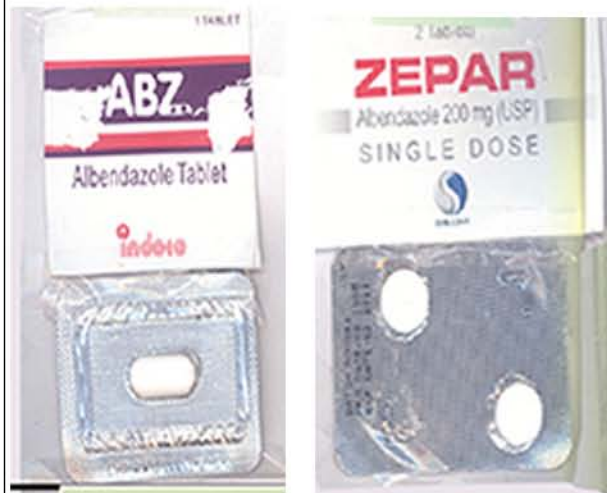

Mebendazole (D6)

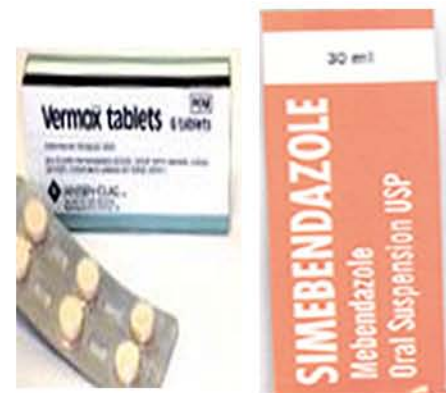

# CARD 2

## Amoxicillin (P1)

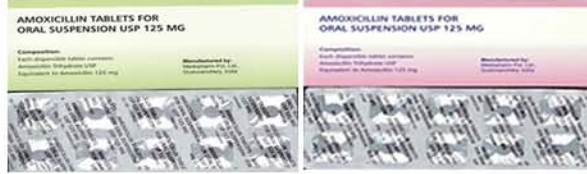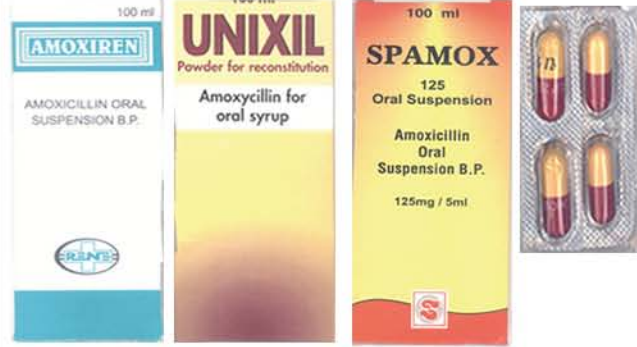

## Co-Amoxicillin (P2)

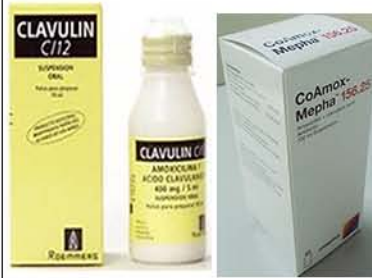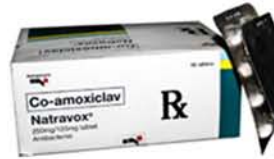

## Ampicillin (P3)

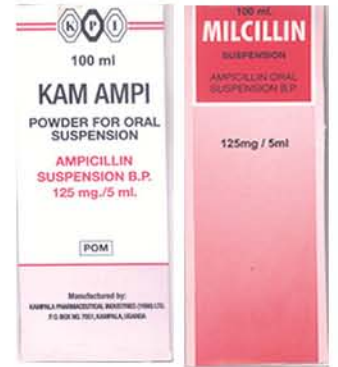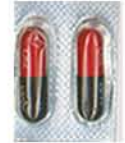

## Cotrimoxazole/Septin (P4)

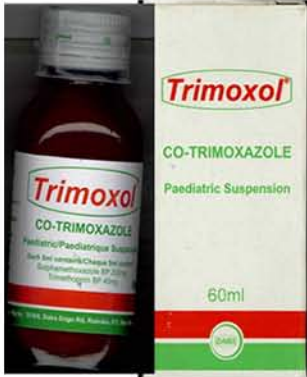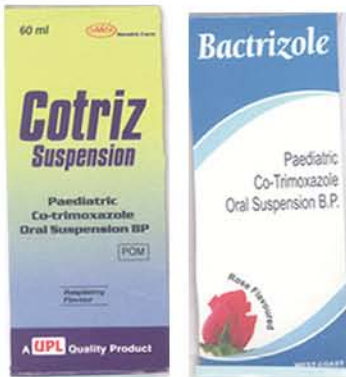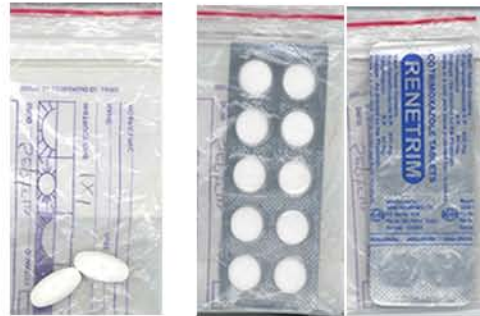

## Chloramphenicol (P5)

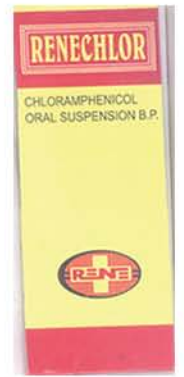

## Erythromycin (P6)

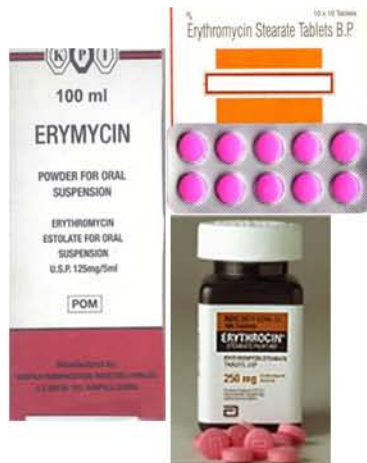

## Azithromycin (P7)

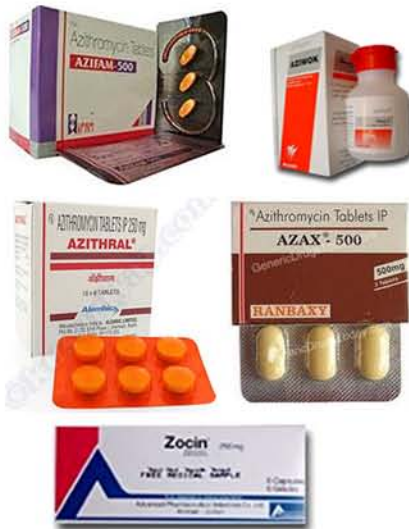

## PEN V (P8)

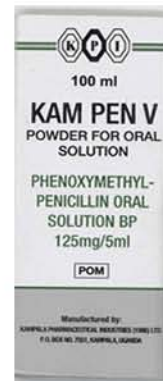

## Cephalexin (P9)

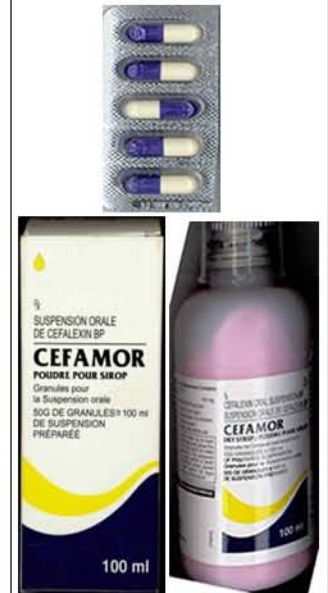



# CARD 3

## Coartem(M1)

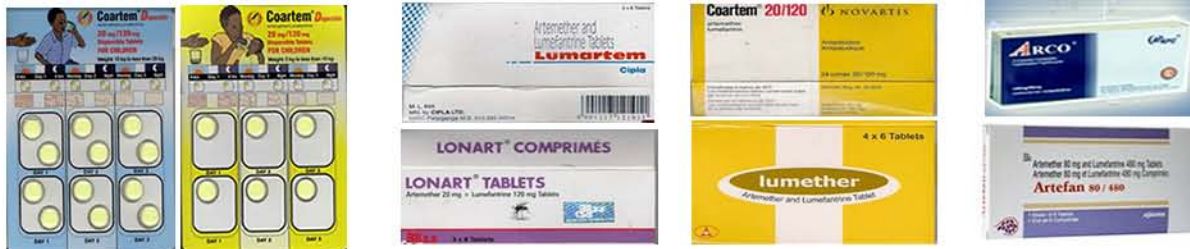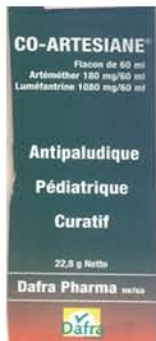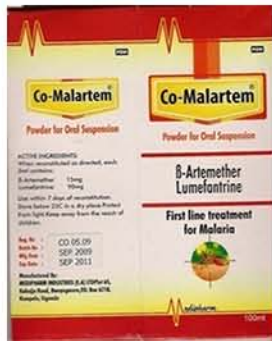

## Duo-Cotecxin(M2)

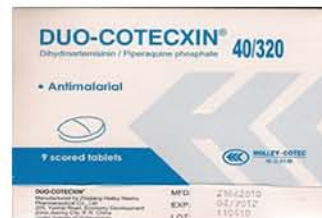

## Rectal artesunate (M3)

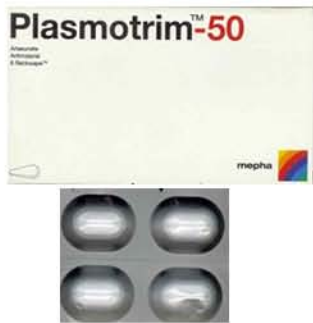

## Artemether (M4)

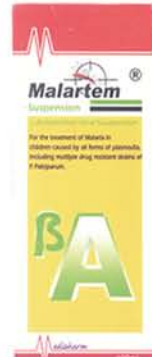

## Fasindar/ SP (M5)

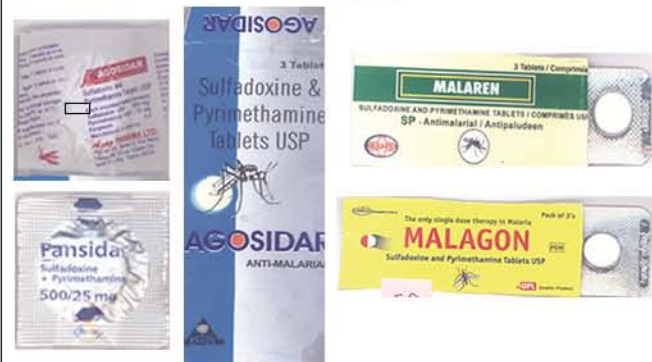

## Amodiaquine(M6)

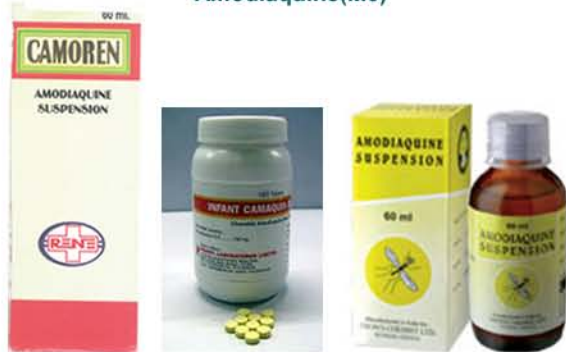

## Amodiaquine/artesunate (M7)

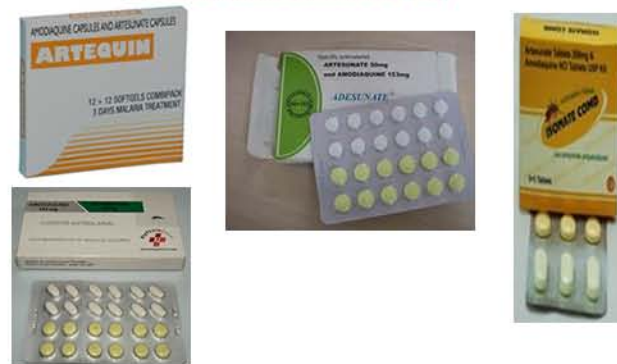

## Quinine (M8)

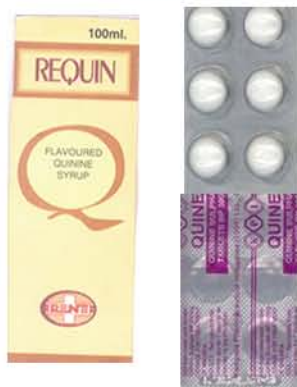

## Chloroquine (M9)

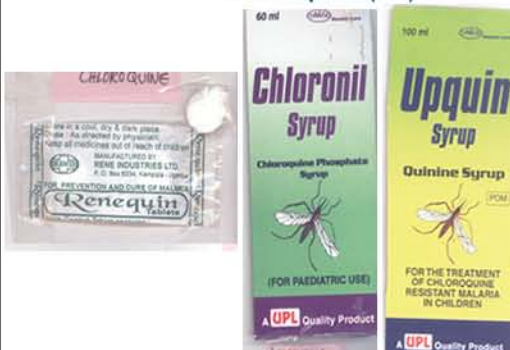

## Artesunate Tablets (M10)

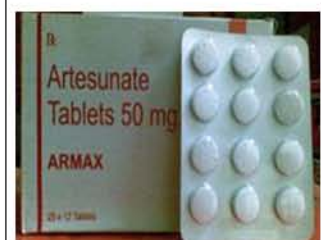

Supplement: pone.0200543.s008.pdf [file pone.0200543.s008.pdf]
