# Supplementary material for: Variation in the quality and out-of-pocket cost of treatment for childhood malaria, diarrhoea, and pneumonia: Community and facility based care in rural Uganda
Source: PubMed Central journal article supplement (PMC6261061; doi:10.1371/journal.pone.0200543), 2018-11-26
Supplement: pone.0200543.s007.pdf [file pone.0200543.s007.pdf]

Integrated Community Case Management of  
Childhood Diseases in Uganda

|                    |
|--------------------|
| FORM ID LABEL HERE |
|--------------------|

**INSCALE BASELINE HOUSEHOLD SURVEY 2011**

Version

15/04/2011

**COMPOUND AND INTERVIEW INFORMATION**

| QUESTION                                       | FORMAT             |                                                                                                                                                          |
|------------------------------------------------|--------------------|----------------------------------------------------------------------------------------------------------------------------------------------------------|
| 1.1. District name                             | text               | _____                                                                                                                                                    |
| 1.2. Subcounty Name                            | text               | _____                                                                                                                                                    |
| 1.3. LC1/Village name                          | text               | _____                                                                                                                                                    |
| 1.4. Interviewer's code                        | no.                | <input type="text"/> <input type="text"/>                                                                                                                |
| 1.5. Date of Interview                         | <DD/MM/20YY>       | <input type="text"/> <input type="text"/> / <input type="text"/> <input type="text"/> / 2 0 <input type="text"/> <input type="text"/>                    |
| 1.6. Time started                              | Hrs: Min<br>circle | <input type="text"/> <input type="text"/> : <input type="text"/> <input type="text"/><br>AM 1<br>PM 2                                                    |
| 1.7. Time ended:                               | Hrs: Min<br>text   | <input type="text"/> <input type="text"/> : <input type="text"/> <input type="text"/><br>AM 1<br>PM 2                                                    |
| 1.8. Written informed consent provided?        | circle             | Yes 1<br>No 2                                                                                                                                            |
| 1.9. Household ID (to be filled by supervisor) |                    | <input type="text"/> <input type="text"/> . <input type="text"/> <input type="text"/> . <input type="text"/> . <input type="text"/> <input type="text"/> |
| 1.10 Was this interview completed?             | circle             | Yes 1<br>No 2                                                                                                                                            |

*If no, explain why not in the comments box below*

1.11 **Do you - the RA - have any comments regarding this visit/interview?:**

S2 SECTION 2 DEMOGRAPHICS AND SES

---

- 2.1.1 What is your name [Official Name] \_\_\_\_\_
- 2.1.2 Do you have another name by which people know you in this community? [Common Name] If none given write NA \_\_\_\_\_
- 2.1.3 [Observe sex of the respondent] Male 1  
Female 2
- 2.1.4 In what year were you born? <YYYY> Don't Know=9999
- 2.1.5 In what month were you born? January 1  
February 2  
March 3  
April 4  
May 5  
June 6  
July 7  
August 8  
September 9  
October 10  
November 11  
December 12  
Don't Know 99
- 2.1.6 What is your age? number Don't Know=999
- 2.1.7 What is your relation to the head of the household I am head of household 1  
Wife or husband 2  
Son or daughter 3  
Son-in-law or daughter-in-law 4  
Grandchild 5  
Parent 6  
Parent-in-law 7  
Brother or Sister 8  
Niece/nephew by blood 9  
Niece/nephew by marriage 10  
Other relative 11  
Adopted/foster/stepchild 12  
Not related 13  
Don't know 99

2.1.8 What is your mother tongue

- |             |    |          |
|-------------|----|----------|
| Acholi      | 1  | → 2.1.10 |
| Alur        | 2  |          |
| Lugisu      | 3  |          |
| Luganda     | 4  |          |
| Lugbara     | 5  |          |
| Rugungu     | 6  |          |
| Rukiga      | 7  |          |
| Runyarwanda | 8  |          |
| Runyoro     | 9  |          |
| Rutoro      | 10 |          |
| Runyankole  | 11 |          |
| Other       | 88 |          |

2.1.9 [If other:] Specify \_\_\_\_\_

2.1.10 What is your religion?

- |                                   |    |          |
|-----------------------------------|----|----------|
| None, don't have one              | 1  | → 2.1.12 |
| Christian (Protestant)            | 2  |          |
| Christian (Roman Catholic)        | 3  |          |
| Christian (Pentecostal)           | 4  |          |
| Christian (Seventh Day Adventist) | 5  |          |
| Muslim                            | 6  |          |
| Traditional                       | 7  |          |
| Faith of Unity                    | 8  |          |
| Other                             | 88 |          |

2.1.11 [If other:] Specify \_\_\_\_\_

2.1.12 What is your principal occupation?

- |                                                      |    |          |
|------------------------------------------------------|----|----------|
| Employed in private sector or by NGO                 | 1  | → 2.1.14 |
| Civil servant                                        | 2  |          |
| Casual worker (manual/agriculture)                   | 3  |          |
| Self-employed farmer/ peasant/fisherman/cattlekeeper | 4  |          |
| Self-employed business man/women                     | 5  |          |
| Domestic work in own household                       | 6  |          |
| Unemployed (looking for work)                        | 7  |          |
| Unemployed (not looking for work)                    | 8  |          |
| Sick/disabled and unable to work                     | 9  |          |
| Student                                              | 10 |          |
| Other                                                | 88 |          |

2.1.13 [If other:] Specify \_\_\_\_\_

2.1.14 Did you attend school? [Also answer Yes if respondent is still in school]

- |     |            |
|-----|------------|
| Yes | 1          |
| No  | 2 → 2.1.16 |

|        |                                                   |        |            |   |   |   |   |   |   |   |   |
|--------|---------------------------------------------------|--------|------------|---|---|---|---|---|---|---|---|
| 2.1.15 | [If Yes:] until which grade/class did you attend? | circle | Primary    | 1 | 2 | 3 | 4 | 5 | 6 | 7 | 8 |
|        |                                                   |        | Secondary  | 1 | 2 | 3 | 4 | 5 | 6 |   |   |
|        |                                                   |        | Tertiary   | 1 | 2 | 3 | 4 | 5 |   |   |   |
|        |                                                   |        | Vocational | 1 | 2 | 3 | 4 |   |   |   |   |

|        |                                                                                                                |                                               |   |
|--------|----------------------------------------------------------------------------------------------------------------|-----------------------------------------------|---|
| 2.1.16 | Can you read and understand a letter or newspaper, easily, or with difficulty, or not at all, in any language? | Yes, I can easily read without any difficulty | 1 |
|        |                                                                                                                | Yes, I can read but with some difficulty      | 2 |
|        |                                                                                                                | No, I cannot read at all                      | 3 |

|        |                                                                                    |                                            |   |
|--------|------------------------------------------------------------------------------------|--------------------------------------------|---|
| 2.1.17 | Can you write a letter easily, or with difficulty, or not at all, in any language? | Yes, I can write easily without difficulty | 1 |
|        |                                                                                    | Yes, I can write with some difficulty      | 2 |
|        |                                                                                    | No, I cannot write at all                  | 3 |

**[CHECK with Q2.1.7]**

[If the respondent is the head of household:] SKIP to question:

2.3.1

[If the respondent is not the head of household, say:]

Now I will ask some questions about the head of this household

2.2.1 What is the name of the head of household? **[Official Name]** \_\_\_\_\_

2.2.2 Does the head of household have another name by which people know him in this community? **[Common Name]** \_\_\_\_\_

|       |                                          |        |   |
|-------|------------------------------------------|--------|---|
| 2.2.3 | Is the head of household Male or Female? | Male   | 1 |
|       |                                          | Female | 2 |

2.2.4 In what year was the head of household born? <YYYY> Don't Know=9999

|       |                                               |            |    |
|-------|-----------------------------------------------|------------|----|
| 2.2.5 | In what month was the head of household born? | JANUARY    | 1  |
|       |                                               | FEBRUARY   | 2  |
|       |                                               | MARCH      | 3  |
|       |                                               | APRIL      | 4  |
|       |                                               | MAY        | 5  |
|       |                                               | JUNE       | 6  |
|       |                                               | JULY       | 7  |
|       |                                               | AUGUST     | 8  |
|       |                                               | SEPTEMBER  | 9  |
|       |                                               | OCTOBER    | 10 |
|       |                                               | NOVEMBER   | 11 |
|       |                                               | DECEMBER   | 12 |
|       |                                               | DON'T KNOW | 99 |

2.2.6 What is the age of the head of household? Don't Know=99

2.2.7 What is the mother tongue of the head of this household?

- Acholi 1 → 2.2.9
- Alur 2
- Lugisu 3
- Luganda 4
- Lugbara 5
- Rugungu 6
- Rukiga 7
- Runyarwanda 8
- Runyoro 9
- Rutoro 10
- Runyankole 11
- Other 88

2.2.8 [If other:] Specify \_\_\_\_\_

2.2.9 What is the religion of the head of household?

- None, doesn't have one 1 → 2.2.11
- Christian (Protestant) 2
- Christian (Roman Catholic) 3
- Christian (Pentecostal) 4
- Christian (Seventh Day Adventist) 5
- Muslim 6
- Traditional 7
- Faith of Unity 8
- Other 88

2.2.10 [If other:] Specify \_\_\_\_\_

2.2.11 What is the principal occupation of the head of household?

- Employed in private sector or by NGO 1 → 2.2.13
- Civil servant 2
- Casual worker (manual/agriculture) 3
- Self-employed farmer/ peasant/fisherman/cattlekeeper 2
- Self-employed business man/women 3
- Domestic work in own household 4
- Unemployed (looking for work) 5
- Unemployed (not looking for work) 6
- Sick/disabled and unable to work 7
- Student 8
- Other 88

2.2.12 [If other:] Specify \_\_\_\_\_

2.2.13 Can the head of household read and understand a letter or newspaper, easily, or with difficulty, or not at all, in any language?

- Yes, head of household can easily read without any difficulty 1
- Yes, the head of household can read but with some difficulty 2
- No, the head of household cannot read at all 3
- Don't know 99

2.2.14 Can the head of household write a letter easily, or with difficulty, or not at all, in any language?

Yes the head of household can write easily without difficulty 1  
 Yes the head of household can write with some difficulty 2  
 No the head of household cannot write at all 3  
 Don't know 99

2.2.15 Did the head of household attend school? [Also answer Yes if still attending school]

Yes 1  
 No 2 → 2.3.1  
 Don't Know 99

2.2.16 [If Yes:] Until which grade/class did the head of household attend?

circle Primary 1 2 3 4 5 6 7 8  
 Secondary 1 2 3 4 5 6  
 Tertiary 1 2 3 4 5  
 Vocational 1 2 3 4  
 Don't Know 99

END OF QUESTIONS ABOUT HEAD OF HOUSEHOLD

2.3.1 How many other members of the household are presently working, besides the head of household and you?

if 00 → 2.3.9

What are the principal occupations of the other household members that are working?

[Write total number of persons working, for each occupation category]

|       |                                                      |                      |                      |
|-------|------------------------------------------------------|----------------------|----------------------|
| 2.3.2 | Employed in private sector or by NGO                 | <input type="text"/> | <input type="text"/> |
| 2.3.3 | Civil servant                                        | <input type="text"/> | <input type="text"/> |
| 2.3.4 | Casual worker (manual/agriculture)                   | <input type="text"/> | <input type="text"/> |
| 2.3.5 | Self-employed farmer/ peasant/fisherman/cattlekeeper | <input type="text"/> | <input type="text"/> |
| 2.3.6 | Self-employed business man/women                     | <input type="text"/> | <input type="text"/> |
| 2.3.7 | Domestic work in own household                       | <input type="text"/> | <input type="text"/> |
| 2.3.8 | Total number working:                                | <input type="text"/> | <input type="text"/> |

[Compare answer to 2.3.8 with 2.3.1 Probe if total doesn't match 2.3.1]

2.3.9 What is the average monthly cash income from wages/salaries into your household?

0.0 UGX / month 1  
 1 < 50,000 UGX/month 2  
 50,000 - <100,000 UGX/month 3  
 100,000 – <200,000 UGX/month 4  
 200,000 – <300,000 UGX/month 5  
 300,000 - <500,000 UGX/month 6  
 500,000 or more UGX/month 7  
 Don't Know 99

[Include regular cash income sent to the household from family members elsewhere]

Does any member of the household own any of the following means of transport? [Read list and answer Yes/No]

|        |                            |     |   |                                       |
|--------|----------------------------|-----|---|---------------------------------------|
| 2.3.10 | an animal drawn cart       | Yes | 1 |                                       |
|        |                            | No  | 2 |                                       |
| 2.3.11 | a bicycle                  | Yes | 1 |                                       |
|        |                            | No  | 2 |                                       |
| 2.3.12 | a motorcycle/scooter       | Yes | 1 |                                       |
|        |                            | No  | 2 |                                       |
| 2.3.13 | a car/truck                | Yes | 1 |                                       |
|        |                            | No  | 2 |                                       |
| 2.3.14 | a boat/canoe without motor | Yes | 1 |                                       |
|        |                            | No  | 2 |                                       |
| 2.3.15 | a boat with motor          | Yes | 1 |                                       |
|        |                            | No  | 2 |                                       |
| 2.3.16 | Other                      | Yes | 1 |                                       |
|        |                            | No  | 2 | <input type="text" value="→ 2.3.18"/> |

2.3.17 [If other:] Specify \_\_\_\_\_

2.3.18 How many rooms do you have in the household? Total number of rooms:

2.3.19 How many rooms are used for sleeping? Rooms used for sleeping:

|        |                                                               |                           |    |                                       |
|--------|---------------------------------------------------------------|---------------------------|----|---------------------------------------|
| 2.3.20 | What is the <b>MAIN</b> source of lighting for the household? | Kerosene/paraffin lantern | 1  | <input type="text" value="→ 2.3.22"/> |
|        |                                                               | Paraffin candle (Tadooba) | 2  |                                       |
|        |                                                               | Firewood                  | 3  |                                       |
|        |                                                               | Candle (Wax)              | 4  |                                       |
|        |                                                               | Electricity               | 5  |                                       |
|        |                                                               | Solar                     | 6  |                                       |
|        |                                                               | Dry Cell lamp             | 7  |                                       |
|        |                                                               | Other                     | 88 |                                       |

2.3.21 [If other:] Specify \_\_\_\_\_

Does your household have ANY of the following items in working condition? [Read out list and circle Yes/No]

|        |                          |     |   |
|--------|--------------------------|-----|---|
| 2.3.22 | electricity (fixed line) | Yes | 1 |
|        |                          | No  | 2 |
| 2.3.23 | solar power/generator    | Yes | 1 |
|        |                          | No  | 2 |
| 2.3.24 | a radio                  | Yes | 1 |
|        |                          | No  | 2 |
| 2.3.25 | a television             | Yes | 1 |
|        |                          | No  | 2 |

- 2.3.26 a mobile phone Yes 1  
No 2
- 2.3.27 a fixed phone Yes 1  
No 2
- 2.3.28 a refrigerator Yes 1  
No 2
- 2.3.29 a bed Yes 1  
No 2
- 2.3.30 a foam mattress Yes 1  
No 2
- 2.3.31 a sofa Yes 1  
No 2
- 2.3.32 a cupboard (for clothing) Yes 1  
No 2
- 2.3.33 a watch/clock Yes 1  
No 2
- 2.3.34 a mosquito net that can be used while sleeping Yes 1  
No 2 → 2.3.37
- 2.3.35 Did the youngest child sleep under a mosquito net last night? Yes 1  
No 2  
Don't Know 99
- 2.3.36 In total, how many of the children under the age of five slept under a mosquito net last night? Don't Know=99
- 2.3.37 Does any member of the household own any animals? Yes 1  
No 2 → 2.3.49

[If Yes:] Does any member of the household own any of the following animals?

[Do not include Cats or Dogs]

[Fill how many of each, Fill 00000 if none. Fill 99999 if don't know]

|        |                           |                      |                      |                      |                      |                      |
|--------|---------------------------|----------------------|----------------------|----------------------|----------------------|----------------------|
| 2.3.38 | Cows                      | <input type="text"/> | <input type="text"/> | <input type="text"/> | <input type="text"/> | <input type="text"/> |
| 2.3.39 | Horses, donkeys, or mules | <input type="text"/> | <input type="text"/> | <input type="text"/> | <input type="text"/> | <input type="text"/> |
| 2.3.40 | Goats                     | <input type="text"/> | <input type="text"/> | <input type="text"/> | <input type="text"/> | <input type="text"/> |
| 2.3.41 | Sheep                     | <input type="text"/> | <input type="text"/> | <input type="text"/> | <input type="text"/> | <input type="text"/> |
| 2.3.42 | Pigs                      | <input type="text"/> | <input type="text"/> | <input type="text"/> | <input type="text"/> | <input type="text"/> |
| 2.3.43 | Chickens or Ducks         | <input type="text"/> | <input type="text"/> | <input type="text"/> | <input type="text"/> | <input type="text"/> |
| 2.3.44 | Turkeys                   | <input type="text"/> | <input type="text"/> | <input type="text"/> | <input type="text"/> | <input type="text"/> |
| 2.3.45 | Rabbits                   | <input type="text"/> | <input type="text"/> | <input type="text"/> | <input type="text"/> | <input type="text"/> |
| 2.3.46 | Beehives                  | <input type="text"/> | <input type="text"/> | <input type="text"/> | <input type="text"/> | <input type="text"/> |
| 2.3.47 | Other                     | <input type="text"/> | <input type="text"/> | <input type="text"/> | <input type="text"/> | 0 → 2.3.49           |

2.3.48 [If other:] Specify \_\_\_\_\_

2.3.49 Does any member of the household own land? Yes 1  
 No 2 → 2.3.54

2.3.50 **[If Yes:]** Was it bought, inherited or given to a member of your household, or is your household "squatter"? **[Multiple answers possible]**  
 Bought 1  
 Inherited or given 2  
 Squatter 3

2.3.51 How much land do members of the household own?  .  Acres  
 Don't know 999.9999

**[Use calculation if measurement is not given in acres. Write your calculation in full on this form and show your ]supervisor for confirmation.]**

2.3.52 How much of this land is agricultural land ?  .  Acres  
 Don't know 999.9999

2.3.53 How much of this land is for other purposes, like for a business or rented out?  .  Acres  
 Don't know 999.9999

2.3.54 What is the **MAIN** type of fuel used for cooking in the household?  
 Firewood 1 → 2.3.56  
 Charcoal 2  
 Paraffin/Kerosene 3  
 Gas 4  
 Electricity 5  
 Crop residue/Straw/Grass 6  
 Animal Dung 7  
 Solar 8  
 No food cooked in household 9  
 Other 88

2.3.55 **[If other:]** Specify \_\_\_\_\_

2.3.56 **[Observe or ask:]** Where is the kitchen located?  
 In the main or only room 1  
 Separate room 2  
 Separate building 3  
 Outside 4

2.3.57 What is the **MAIN** source of drinking water for members of your household?  
 Piped water to home 1 → S3  
 Public tap 2  
 Unprotected well 3  
 Protected well 4  
 Unprotected spring 5  
 Protected spring 6  
 Borehole 7  
 River/stream 8  
 Stagnant pool/lake 9  
 Rainwater collection 10  
 Purchase water/truck 11  
 Other 88

2.3.58 **[If other:]** Specify \_\_\_\_\_

**53 SECTION 3 : LIST ALL CHILDREN UNDER 5 AND THEIR DEMOGRAPHIC CHARACTERISTICS**

**[Re-confirm that the respondent is the primary caretaker of the children in this household.  
Include all children under five, under the care of this household, who slept in this house last night.  
Make sure the list isn't limited to the children of the caretaker only.]**

**[SAY: ]**

Now I will ask you some questions about the children under five years of age  
Who are under your care in this household, and slept here last night.

3.1 How many children under age of 5 years, who slept here last night, are part  
of your household ?

|  |  |
|--|--|
|  |  |
|--|--|

**[Say:] Now I will ask some questions about each of the children under five years of age**

| <b>CHILD 01</b>                                                                                                                                          |                                                                                                                                                                                                                                                                                                                                                                                                                                                                                                                                                                                                                                                                                                                                                                                                                                                                                                                                                                                                                                                                                                                                                                                                                                                                                        |          |    |  |        |   |  |         |   |  |            |   |  |                         |   |  |       |    |  |
|----------------------------------------------------------------------------------------------------------------------------------------------------------|----------------------------------------------------------------------------------------------------------------------------------------------------------------------------------------------------------------------------------------------------------------------------------------------------------------------------------------------------------------------------------------------------------------------------------------------------------------------------------------------------------------------------------------------------------------------------------------------------------------------------------------------------------------------------------------------------------------------------------------------------------------------------------------------------------------------------------------------------------------------------------------------------------------------------------------------------------------------------------------------------------------------------------------------------------------------------------------------------------------------------------------------------------------------------------------------------------------------------------------------------------------------------------------|----------|----|--|--------|---|--|---------|---|--|------------|---|--|-------------------------|---|--|-------|----|--|
| 3.1.1 What is the child's name?                                                                                                                          | _____ <table border="1" style="display: inline-table; vertical-align: middle;"><tr><td style="width: 20px; height: 20px; text-align: center;"><b>C</b></td><td style="width: 20px; height: 20px; text-align: center;">01</td></tr></table>                                                                                                                                                                                                                                                                                                                                                                                                                                                                                                                                                                                                                                                                                                                                                                                                                                                                                                                                                                                                                                             | <b>C</b> | 01 |  |        |   |  |         |   |  |            |   |  |                         |   |  |       |    |  |
| <b>C</b>                                                                                                                                                 | 01                                                                                                                                                                                                                                                                                                                                                                                                                                                                                                                                                                                                                                                                                                                                                                                                                                                                                                                                                                                                                                                                                                                                                                                                                                                                                     |          |    |  |        |   |  |         |   |  |            |   |  |                         |   |  |       |    |  |
| 3.1.2 Is the child less than one month old?                                                                                                              | Yes 1<br>No 2                                                                                                                                                                                                                                                                                                                                                                                                                                                                                                                                                                                                                                                                                                                                                                                                                                                                                                                                                                                                                                                                                                                                                                                                                                                                          |          |    |  |        |   |  |         |   |  |            |   |  |                         |   |  |       |    |  |
| <b>[If the child is less than one month old, write the age in WEEKS and DAYS. If the child is one month or older, write the age in YEARS and MONTHS]</b> |                                                                                                                                                                                                                                                                                                                                                                                                                                                                                                                                                                                                                                                                                                                                                                                                                                                                                                                                                                                                                                                                                                                                                                                                                                                                                        |          |    |  |        |   |  |         |   |  |            |   |  |                         |   |  |       |    |  |
| 3.1.3 What is the child's age?                                                                                                                           | <u>WEEKS, DAYS</u> OR <u>YEARS, MONTHS</u> <table border="1" style="display: inline-table; vertical-align: middle;"><tr><td style="width: 20px; height: 20px;"></td><td style="width: 20px; height: 20px;"></td></tr></table> , <table border="1" style="display: inline-table; vertical-align: middle;"><tr><td style="width: 20px; height: 20px;"></td><td style="width: 20px; height: 20px;"></td></tr></table>                                                                                                                                                                                                                                                                                                                                                                                                                                                                                                                                                                                                                                                                                                                                                                                                                                                                     |          |    |  |        |   |  |         |   |  |            |   |  |                         |   |  |       |    |  |
|                                                                                                                                                          |                                                                                                                                                                                                                                                                                                                                                                                                                                                                                                                                                                                                                                                                                                                                                                                                                                                                                                                                                                                                                                                                                                                                                                                                                                                                                        |          |    |  |        |   |  |         |   |  |            |   |  |                         |   |  |       |    |  |
|                                                                                                                                                          |                                                                                                                                                                                                                                                                                                                                                                                                                                                                                                                                                                                                                                                                                                                                                                                                                                                                                                                                                                                                                                                                                                                                                                                                                                                                                        |          |    |  |        |   |  |         |   |  |            |   |  |                         |   |  |       |    |  |
| 3.1.4 What is the child's date of birth?                                                                                                                 | <DD/MM/20YY> <table border="1" style="display: inline-table; vertical-align: middle;"><tr><td style="width: 20px; height: 20px;"></td><td style="width: 20px; height: 20px;"></td></tr></table> / <table border="1" style="display: inline-table; vertical-align: middle;"><tr><td style="width: 20px; height: 20px;"></td><td style="width: 20px; height: 20px;"></td></tr></table> / 2 0 <table border="1" style="display: inline-table; vertical-align: middle;"><tr><td style="width: 20px; height: 20px;"></td><td style="width: 20px; height: 20px;"></td></tr></table>                                                                                                                                                                                                                                                                                                                                                                                                                                                                                                                                                                                                                                                                                                          |          |    |  |        |   |  |         |   |  |            |   |  |                         |   |  |       |    |  |
|                                                                                                                                                          |                                                                                                                                                                                                                                                                                                                                                                                                                                                                                                                                                                                                                                                                                                                                                                                                                                                                                                                                                                                                                                                                                                                                                                                                                                                                                        |          |    |  |        |   |  |         |   |  |            |   |  |                         |   |  |       |    |  |
|                                                                                                                                                          |                                                                                                                                                                                                                                                                                                                                                                                                                                                                                                                                                                                                                                                                                                                                                                                                                                                                                                                                                                                                                                                                                                                                                                                                                                                                                        |          |    |  |        |   |  |         |   |  |            |   |  |                         |   |  |       |    |  |
|                                                                                                                                                          |                                                                                                                                                                                                                                                                                                                                                                                                                                                                                                                                                                                                                                                                                                                                                                                                                                                                                                                                                                                                                                                                                                                                                                                                                                                                                        |          |    |  |        |   |  |         |   |  |            |   |  |                         |   |  |       |    |  |
| <small>dont know = 99/99/2099</small>                                                                                                                    |                                                                                                                                                                                                                                                                                                                                                                                                                                                                                                                                                                                                                                                                                                                                                                                                                                                                                                                                                                                                                                                                                                                                                                                                                                                                                        |          |    |  |        |   |  |         |   |  |            |   |  |                         |   |  |       |    |  |
| 3.1.5 What is the child's sex?                                                                                                                           | Male 1<br>Female 2                                                                                                                                                                                                                                                                                                                                                                                                                                                                                                                                                                                                                                                                                                                                                                                                                                                                                                                                                                                                                                                                                                                                                                                                                                                                     |          |    |  |        |   |  |         |   |  |            |   |  |                         |   |  |       |    |  |
| 3.1.6 What is your relation to this child?                                                                                                               | <table border="1" style="display: inline-table; vertical-align: middle;"> <tr><td style="width: 20px; height: 20px; text-align: center;">Mother</td><td style="width: 20px; height: 20px; text-align: center;">1</td><td style="width: 20px; height: 20px;"></td></tr> <tr><td style="width: 20px; height: 20px; text-align: center;">Father</td><td style="width: 20px; height: 20px; text-align: center;">2</td><td style="width: 20px; height: 20px;"></td></tr> <tr><td style="width: 20px; height: 20px; text-align: center;">Sibling</td><td style="width: 20px; height: 20px; text-align: center;">3</td><td style="width: 20px; height: 20px;"></td></tr> <tr><td style="width: 20px; height: 20px; text-align: center;">Aunt/Uncle</td><td style="width: 20px; height: 20px; text-align: center;">4</td><td style="width: 20px; height: 20px;"></td></tr> <tr><td style="width: 20px; height: 20px; text-align: center;">Grandfather/Grandmother</td><td style="width: 20px; height: 20px; text-align: center;">5</td><td style="width: 20px; height: 20px;"></td></tr> <tr><td style="width: 20px; height: 20px; text-align: center;">Other</td><td style="width: 20px; height: 20px; text-align: center;">88</td><td style="width: 20px; height: 20px;"></td></tr> </table> | Mother   | 1  |  | Father | 2 |  | Sibling | 3 |  | Aunt/Uncle | 4 |  | Grandfather/Grandmother | 5 |  | Other | 88 |  |
| Mother                                                                                                                                                   | 1                                                                                                                                                                                                                                                                                                                                                                                                                                                                                                                                                                                                                                                                                                                                                                                                                                                                                                                                                                                                                                                                                                                                                                                                                                                                                      |          |    |  |        |   |  |         |   |  |            |   |  |                         |   |  |       |    |  |
| Father                                                                                                                                                   | 2                                                                                                                                                                                                                                                                                                                                                                                                                                                                                                                                                                                                                                                                                                                                                                                                                                                                                                                                                                                                                                                                                                                                                                                                                                                                                      |          |    |  |        |   |  |         |   |  |            |   |  |                         |   |  |       |    |  |
| Sibling                                                                                                                                                  | 3                                                                                                                                                                                                                                                                                                                                                                                                                                                                                                                                                                                                                                                                                                                                                                                                                                                                                                                                                                                                                                                                                                                                                                                                                                                                                      |          |    |  |        |   |  |         |   |  |            |   |  |                         |   |  |       |    |  |
| Aunt/Uncle                                                                                                                                               | 4                                                                                                                                                                                                                                                                                                                                                                                                                                                                                                                                                                                                                                                                                                                                                                                                                                                                                                                                                                                                                                                                                                                                                                                                                                                                                      |          |    |  |        |   |  |         |   |  |            |   |  |                         |   |  |       |    |  |
| Grandfather/Grandmother                                                                                                                                  | 5                                                                                                                                                                                                                                                                                                                                                                                                                                                                                                                                                                                                                                                                                                                                                                                                                                                                                                                                                                                                                                                                                                                                                                                                                                                                                      |          |    |  |        |   |  |         |   |  |            |   |  |                         |   |  |       |    |  |
| Other                                                                                                                                                    | 88                                                                                                                                                                                                                                                                                                                                                                                                                                                                                                                                                                                                                                                                                                                                                                                                                                                                                                                                                                                                                                                                                                                                                                                                                                                                                     |          |    |  |        |   |  |         |   |  |            |   |  |                         |   |  |       |    |  |
| 3.1.7                                                                                                                                                    | [If other:] Specify _____                                                                                                                                                                                                                                                                                                                                                                                                                                                                                                                                                                                                                                                                                                                                                                                                                                                                                                                                                                                                                                                                                                                                                                                                                                                              |          |    |  |        |   |  |         |   |  |            |   |  |                         |   |  |       |    |  |
| <b>CHILD 02</b>                                                                                                                                          |                                                                                                                                                                                                                                                                                                                                                                                                                                                                                                                                                                                                                                                                                                                                                                                                                                                                                                                                                                                                                                                                                                                                                                                                                                                                                        |          |    |  |        |   |  |         |   |  |            |   |  |                         |   |  |       |    |  |
| 3.2.1 What is the child's name?                                                                                                                          | _____ <table border="1" style="display: inline-table; vertical-align: middle;"><tr><td style="width: 20px; height: 20px; text-align: center;"><b>C</b></td><td style="width: 20px; height: 20px; text-align: center;">02</td></tr></table>                                                                                                                                                                                                                                                                                                                                                                                                                                                                                                                                                                                                                                                                                                                                                                                                                                                                                                                                                                                                                                             | <b>C</b> | 02 |  |        |   |  |         |   |  |            |   |  |                         |   |  |       |    |  |
| <b>C</b>                                                                                                                                                 | 02                                                                                                                                                                                                                                                                                                                                                                                                                                                                                                                                                                                                                                                                                                                                                                                                                                                                                                                                                                                                                                                                                                                                                                                                                                                                                     |          |    |  |        |   |  |         |   |  |            |   |  |                         |   |  |       |    |  |
| 3.2.2 Is the child less than one month old?                                                                                                              | Yes 1<br>No 2                                                                                                                                                                                                                                                                                                                                                                                                                                                                                                                                                                                                                                                                                                                                                                                                                                                                                                                                                                                                                                                                                                                                                                                                                                                                          |          |    |  |        |   |  |         |   |  |            |   |  |                         |   |  |       |    |  |
| <b>[If the child is less than one month old, write the age in WEEKS and DAYS. If the child is one month or older, write the age in YEARS and MONTHS]</b> |                                                                                                                                                                                                                                                                                                                                                                                                                                                                                                                                                                                                                                                                                                                                                                                                                                                                                                                                                                                                                                                                                                                                                                                                                                                                                        |          |    |  |        |   |  |         |   |  |            |   |  |                         |   |  |       |    |  |
| 3.2.3 What is the child's age?                                                                                                                           | <u>WEEKS, DAYS</u> OR <u>YEARS, MONTHS</u> <table border="1" style="display: inline-table; vertical-align: middle;"><tr><td style="width: 20px; height: 20px;"></td><td style="width: 20px; height: 20px;"></td></tr></table> , <table border="1" style="display: inline-table; vertical-align: middle;"><tr><td style="width: 20px; height: 20px;"></td><td style="width: 20px; height: 20px;"></td></tr></table>                                                                                                                                                                                                                                                                                                                                                                                                                                                                                                                                                                                                                                                                                                                                                                                                                                                                     |          |    |  |        |   |  |         |   |  |            |   |  |                         |   |  |       |    |  |
|                                                                                                                                                          |                                                                                                                                                                                                                                                                                                                                                                                                                                                                                                                                                                                                                                                                                                                                                                                                                                                                                                                                                                                                                                                                                                                                                                                                                                                                                        |          |    |  |        |   |  |         |   |  |            |   |  |                         |   |  |       |    |  |
|                                                                                                                                                          |                                                                                                                                                                                                                                                                                                                                                                                                                                                                                                                                                                                                                                                                                                                                                                                                                                                                                                                                                                                                                                                                                                                                                                                                                                                                                        |          |    |  |        |   |  |         |   |  |            |   |  |                         |   |  |       |    |  |
| 3.2.4 What is the child's date of birth?                                                                                                                 | <DD/MM/20YY> <table border="1" style="display: inline-table; vertical-align: middle;"><tr><td style="width: 20px; height: 20px;"></td><td style="width: 20px; height: 20px;"></td></tr></table> / <table border="1" style="display: inline-table; vertical-align: middle;"><tr><td style="width: 20px; height: 20px;"></td><td style="width: 20px; height: 20px;"></td></tr></table> / 2 0 <table border="1" style="display: inline-table; vertical-align: middle;"><tr><td style="width: 20px; height: 20px;"></td><td style="width: 20px; height: 20px;"></td></tr></table>                                                                                                                                                                                                                                                                                                                                                                                                                                                                                                                                                                                                                                                                                                          |          |    |  |        |   |  |         |   |  |            |   |  |                         |   |  |       |    |  |
|                                                                                                                                                          |                                                                                                                                                                                                                                                                                                                                                                                                                                                                                                                                                                                                                                                                                                                                                                                                                                                                                                                                                                                                                                                                                                                                                                                                                                                                                        |          |    |  |        |   |  |         |   |  |            |   |  |                         |   |  |       |    |  |
|                                                                                                                                                          |                                                                                                                                                                                                                                                                                                                                                                                                                                                                                                                                                                                                                                                                                                                                                                                                                                                                                                                                                                                                                                                                                                                                                                                                                                                                                        |          |    |  |        |   |  |         |   |  |            |   |  |                         |   |  |       |    |  |
|                                                                                                                                                          |                                                                                                                                                                                                                                                                                                                                                                                                                                                                                                                                                                                                                                                                                                                                                                                                                                                                                                                                                                                                                                                                                                                                                                                                                                                                                        |          |    |  |        |   |  |         |   |  |            |   |  |                         |   |  |       |    |  |
| <small>dont know = 99/99/2099</small>                                                                                                                    |                                                                                                                                                                                                                                                                                                                                                                                                                                                                                                                                                                                                                                                                                                                                                                                                                                                                                                                                                                                                                                                                                                                                                                                                                                                                                        |          |    |  |        |   |  |         |   |  |            |   |  |                         |   |  |       |    |  |
| 3.2.5 What is the child's sex?                                                                                                                           | Male 1<br>Female 2                                                                                                                                                                                                                                                                                                                                                                                                                                                                                                                                                                                                                                                                                                                                                                                                                                                                                                                                                                                                                                                                                                                                                                                                                                                                     |          |    |  |        |   |  |         |   |  |            |   |  |                         |   |  |       |    |  |
| 3.2.6 What is your relation to this child?                                                                                                               | <table border="1" style="display: inline-table; vertical-align: middle;"> <tr><td style="width: 20px; height: 20px; text-align: center;">Mother</td><td style="width: 20px; height: 20px; text-align: center;">1</td><td style="width: 20px; height: 20px;"></td></tr> <tr><td style="width: 20px; height: 20px; text-align: center;">Father</td><td style="width: 20px; height: 20px; text-align: center;">2</td><td style="width: 20px; height: 20px;"></td></tr> <tr><td style="width: 20px; height: 20px; text-align: center;">Sibling</td><td style="width: 20px; height: 20px; text-align: center;">3</td><td style="width: 20px; height: 20px;"></td></tr> <tr><td style="width: 20px; height: 20px; text-align: center;">Aunt/Uncle</td><td style="width: 20px; height: 20px; text-align: center;">4</td><td style="width: 20px; height: 20px;"></td></tr> <tr><td style="width: 20px; height: 20px; text-align: center;">Grandfather/Grandmother</td><td style="width: 20px; height: 20px; text-align: center;">5</td><td style="width: 20px; height: 20px;"></td></tr> <tr><td style="width: 20px; height: 20px; text-align: center;">Other</td><td style="width: 20px; height: 20px; text-align: center;">88</td><td style="width: 20px; height: 20px;"></td></tr> </table> | Mother   | 1  |  | Father | 2 |  | Sibling | 3 |  | Aunt/Uncle | 4 |  | Grandfather/Grandmother | 5 |  | Other | 88 |  |
| Mother                                                                                                                                                   | 1                                                                                                                                                                                                                                                                                                                                                                                                                                                                                                                                                                                                                                                                                                                                                                                                                                                                                                                                                                                                                                                                                                                                                                                                                                                                                      |          |    |  |        |   |  |         |   |  |            |   |  |                         |   |  |       |    |  |
| Father                                                                                                                                                   | 2                                                                                                                                                                                                                                                                                                                                                                                                                                                                                                                                                                                                                                                                                                                                                                                                                                                                                                                                                                                                                                                                                                                                                                                                                                                                                      |          |    |  |        |   |  |         |   |  |            |   |  |                         |   |  |       |    |  |
| Sibling                                                                                                                                                  | 3                                                                                                                                                                                                                                                                                                                                                                                                                                                                                                                                                                                                                                                                                                                                                                                                                                                                                                                                                                                                                                                                                                                                                                                                                                                                                      |          |    |  |        |   |  |         |   |  |            |   |  |                         |   |  |       |    |  |
| Aunt/Uncle                                                                                                                                               | 4                                                                                                                                                                                                                                                                                                                                                                                                                                                                                                                                                                                                                                                                                                                                                                                                                                                                                                                                                                                                                                                                                                                                                                                                                                                                                      |          |    |  |        |   |  |         |   |  |            |   |  |                         |   |  |       |    |  |
| Grandfather/Grandmother                                                                                                                                  | 5                                                                                                                                                                                                                                                                                                                                                                                                                                                                                                                                                                                                                                                                                                                                                                                                                                                                                                                                                                                                                                                                                                                                                                                                                                                                                      |          |    |  |        |   |  |         |   |  |            |   |  |                         |   |  |       |    |  |
| Other                                                                                                                                                    | 88                                                                                                                                                                                                                                                                                                                                                                                                                                                                                                                                                                                                                                                                                                                                                                                                                                                                                                                                                                                                                                                                                                                                                                                                                                                                                     |          |    |  |        |   |  |         |   |  |            |   |  |                         |   |  |       |    |  |
| 3.2.7                                                                                                                                                    | [If other:] Specify _____                                                                                                                                                                                                                                                                                                                                                                                                                                                                                                                                                                                                                                                                                                                                                                                                                                                                                                                                                                                                                                                                                                                                                                                                                                                              |          |    |  |        |   |  |         |   |  |            |   |  |                         |   |  |       |    |  |

**CHILD 03**

3.3.1 What is the child's name? \_\_\_\_\_ **C 03**

3.3.2 Is the child less than one month old? Yes 1  
No 2

**[If the child is less than one month old, write the age in WEEKS and DAYS. If the child is one month or older, write the age in YEARS and MONTHS]**

3.3.3 What is the child's age? WEEKS, DAYS OR YEARS, MONTHS ,

3.3.4 What is the child's date of birth? <DD/MM/20YY>  /  / 2 0   
dont know = 99/99/2099

3.3.5 What is the child's sex? Male 1  
Female 2

3.3.6 What is your relation to this child? Mother 1 → 3.4.1  
Father 2  
Sibling 3  
Aunt/Uncle 4  
Grandfather/Grandmother 5  
Other 88

3.3.7 **[If other:]** Specify \_\_\_\_\_

**CHILD 04**

3.4.1 What is the child's name? \_\_\_\_\_ **C 04**

3.4.2 Is the child less than one month old? Yes 1  
No 2

**[If the child is less than one month old, write the age in WEEKS and DAYS. If the child is one month or older, write the age in YEARS and MONTHS]**

3.4.3 What is the child's age? WEEKS, DAYS OR YEARS, MONTHS ,

3.4.4 What is the child's date of birth? <DD/MM/20YY>  /  / 2 0   
dont know = 99/99/2099

3.4.5 What is the child's sex? Male 1  
Female 2

3.4.6 What is your relation to this child? Mother 1 → 3.5.1  
Father 2  
Sibling 3  
Aunt/Uncle 4  
Grandfather/Grandmother 5  
Other 88

3.4.7 **[If other:]** Specify \_\_\_\_\_

**CHILD 05**

3.5.1 What is the child's name? \_\_\_\_\_ **C 05**

3.5.2 Is the child less than one month old? Yes 1  
No 2

**[If the child is less than one month old, write the age in WEEKS and DAYS. If the child is one month or older, write the age in YEARS and MONTHS]**

3.5.3 What is the child's age? WEEKS, DAYS OR YEARS, MONTHS [ ] , [ ][ ]

3.5.4 What is the child's date of birth? <DD/MM/20YY> [ ][ ] / [ ][ ] / 2 0 [ ][ ]  
dont know = 99/99/2099

3.5.5 What is the child's sex? Male 1  
Female 2

3.5.6 What is your relation to this child? Mother 1 → 3.6.1  
Father 2  
Sibling 3  
Aunt/Uncle 4  
Grandfather/Grandmother 5  
Other 88

3.5.7 [If other:] Specify \_\_\_\_\_

**CHILD 06**

3.6.1 What is the child's name? \_\_\_\_\_ **C 06**

3.6.2 Is the child less than one month old? Yes 1  
No 2

**[If the child is less than one month old, write the age in WEEKS and DAYS. If the child is one month or older, write the age in YEARS and MONTHS]**

3.6.3 What is the child's age? WEEKS, DAYS OR YEARS, MONTHS [ ] , [ ][ ]

3.6.4 What is the child's date of birth? <DD/MM/20YY> [ ][ ] / [ ][ ] / 2 0 [ ][ ]  
dont know = 99/99/2099

3.6.5 What is the child's sex? Male 1  
Female 2

3.6.6 What is your relation to this child? Mother 1 → 3.7.1  
Father 2  
Sibling 3  
Aunt/Uncle 4  
Grandfather/Grandmother 5  
Other 88

3.6.7 [If other:] Specify \_\_\_\_\_

**CHILD 07**

3.7.1 What is the child's name? \_\_\_\_\_ **C 07**

3.7.2 Is the child less than one month old? Yes 1  
No 2

**[If the child is less than one month old, write the age in WEEKS and DAYS. If the child is one month or older, write the age in YEARS and MONTHS]**

3.7.3 What is the child's age? WEEKS, DAYS OR YEARS, MONTHS ,

3.7.4 What is the child's date of birth? <DD/MM/20YY>  /  / 2 0   
dont know = 99/99/2099

3.7.5 What is the child's sex? Male 1  
Female 2

3.7.6 What is your relation to this child?

|                         |    |         |
|-------------------------|----|---------|
| Mother                  | 1  | → 3.8.1 |
| Father                  | 2  |         |
| Sibling                 | 3  |         |
| Aunt/Uncle              | 4  |         |
| Grandfather/Grandmother | 5  |         |
| Other                   | 88 |         |

3.7.7 **[If other:]** Specify \_\_\_\_\_

**CHILD 08**

3.8.1 What is the child's name? \_\_\_\_\_ **C 08**

3.8.2 Is the child less than one month old? Yes 1  
No 2

**[If the child is less than one month old, write the age in WEEKS and DAYS. If the child is one month or older, write the age in YEARS and MONTHS]**

3.8.3 What is the child's age? WEEKS, DAYS OR YEARS, MONTHS ,

3.8.4 What is the child's date of birth? <DD/MM/20YY>  /  / 2 0   
dont know = 99/99/2099

3.8.5 What is the child's sex? Male 1  
Female 2

3.8.6 What is your relation to this child?

|                         |    |         |
|-------------------------|----|---------|
| Mother                  | 1  | → 3.9.1 |
| Father                  | 2  |         |
| Sibling                 | 3  |         |
| Aunt/Uncle              | 4  |         |
| Grandfather/Grandmother | 5  |         |
| Other                   | 88 |         |

3.8.7 **[If other:]** Specify \_\_\_\_\_

**CHILD 09**

3.9.1 What is the child's name? \_\_\_\_\_ **C 09**

3.9.2 Is the child less than one month old? Yes 1  
No 2

**[If the child is less than one month old, write the age in WEEKS and DAYS. If the child is one month or older, write the age in YEARS and MONTHS]**

3.9.3 What is the child's age? WEEKS, DAYS OR YEARS, MONTHS ,

3.9.4 What is the child's date of birth? <DD/MM/20YY>  /  / 2 0   
dont know = 99/99/2099

3.9.5 What is the child's sex? Male 1  
Female 2

3.9.6 What is your relation to this child? Mother 1 → 3.10.1  
Father 2  
Sibling 3  
Aunt/Uncle 4  
Grandfather/Grandmother 5  
Other 88

3.9.7 **[If other:]** Specify \_\_\_\_\_

**CHILD 10**

3.10.1 What is the child's name? \_\_\_\_\_ **C 10**

3.10.2 Is the child less than one month old? Yes 1  
No 2

**[If the child is less than one month old, write the age in WEEKS and DAYS. If the child is one month or older, write the age in YEARS and MONTHS]**

3.10.3 What is the child's age? WEEKS, DAYS OR YEARS, MONTHS ,

3.10.4 What is the child's date of birth? <DD/MM/20YY>  /  / 2 0   
dont know = 99/99/2099

3.10.5 What is the child's sex? Male 1  
Female 2

3.10.6 What is your relation to this child? Mother 1 → 3.11  
Father 2  
Sibling 3  
Aunt/Uncle 4  
Grandfather/Grandmother 5  
Other 88

3.10.7 **[If other:]** Specify \_\_\_\_\_

**[Say]** Now I would like to ask whether any of these children have been sick in the last 2 weeks, including today:

- 3.11 In the last 2 weeks, including today, has <NAME> C01 been sick? Yes 1  
No 2
- 3.12 In the last 2 weeks, including today, has <NAME> C02 been sick? Yes 1  
No 2
- 3.13 In the last 2 weeks, including today, has <NAME> C03 been sick? Yes 1  
No 2
- 3.14 In the last 2 weeks, including today, has <NAME> C04 been sick? Yes 1  
No 2
- 3.15 In the last 2 weeks, including today, has <NAME> C05 been sick? Yes 1  
No 2
- 3.16 In the last 2 weeks, including today, has <NAME> C06 been sick? Yes 1  
No 2
- 3.17 In the last 2 weeks, including today, has <NAME> C07 been sick? Yes 1  
No 2
- 3.18 In the last 2 weeks, including today, has <NAME> C08 been sick? Yes 1  
No 2
- 3.19 In the last 2 weeks, including today, has <NAME> C09 been sick? Yes 1  
No 2
- 3.20 In the last 2 weeks, including today, has <NAME> C10 been sick? Yes 1  
No 2

3.21 Confirm total number of children sick in the past two weeks

if 00 → S5

**S4 SECTION 4. ILLNESS, CARE SEEKING AND TREATMENT**

4.1.1 [Copy the form id from the label on front page - section 1]

|  |  |  |  |  |  |  |  |
|--|--|--|--|--|--|--|--|
|  |  |  |  |  |  |  |  |
|--|--|--|--|--|--|--|--|

[Complete section 4 for one child's illness episode.]

[Then repeat on separate section 4 forms for the other sick children mentioned in section 3]

[For which child are you filling out this section 4?]

[Confirm with respondent from section 3:]

4.1.2 CHILD CODE=

C 

|  |  |
|--|--|
|  |  |
|--|--|

4.1.3 NAME \_\_\_\_\_

4.1.4 What is the child's AGE

WEEKS, DAYS OR YEARS, MONTHS

|  |   |  |  |
|--|---|--|--|
|  | , |  |  |
|--|---|--|--|

Question

- |        |                                                                                                                  |                                                                           |   |         |
|--------|------------------------------------------------------------------------------------------------------------------|---------------------------------------------------------------------------|---|---------|
| 4.2.1  | Has (name) had an illness with a cough at any time in the last 2 weeks?                                          | Yes 1<br>No <table border="1"><tr><td>2</td><td>→ 4.2.3</td></tr></table> | 2 | → 4.2.3 |
| 2      | → 4.2.3                                                                                                          |                                                                           |   |         |
| 4.2.2  | If Yes, when (name) had an illness with a cough, did he/she breathe faster than usual with short, rapid breaths? | Yes 1<br>No 2                                                             |   |         |
| 4.2.3  | Has (name) been ill with a fever at any time in the last 2 weeks, including today?                               | Yes 1<br>No 2                                                             |   |         |
| 4.2.4  | Has (name) been ill with diarrhoea at any time in the last 2 weeks, including today?                             | Yes 1<br>No <table border="1"><tr><td>2</td><td>→ 4.2.7</td></tr></table> | 2 | → 4.2.7 |
| 2      | → 4.2.7                                                                                                          |                                                                           |   |         |
| 4.2.5  | How many stools in a day <u>and</u> the following night did (name) have?                                         | <table border="1"><tr><td> </td><td> </td></tr></table>                   |   |         |
|        |                                                                                                                  |                                                                           |   |         |
| 4.2.6  | Was the diarrhoea: <b>[probe]</b>                                                                                | Watery 1<br>Mucoid 2<br>Bloody 3                                          |   |         |
| 4.2.7  | Did (name) have any of the following symptoms: <span style="float: right;">Convulsions</span>                    | Yes 1<br>No 2                                                             |   |         |
| 4.2.8  | <b>[Read options]</b> <span style="float: right;">Unconsciousness</span>                                         | Yes 1<br>No 2                                                             |   |         |
| 4.2.9  | <span style="float: right;">Lethargy/abnormally sleepy</span>                                                    | Yes 1<br>No 2                                                             |   |         |
| 4.2.10 | <span style="float: right;">Vomiting everything</span>                                                           | Yes 1<br>No 2                                                             |   |         |
| 4.2.11 | <span style="float: right;">Not drinking/breastfeeding</span>                                                    | Yes 1<br>No 2                                                             |   |         |
| 4.2.12 | <span style="float: right;">Chest indrawing</span>                                                               | Yes 1<br>No 2                                                             |   |         |
| 4.3.1  | Did you seek advice or treatment for the illness episode outside the home?                                       | Yes <table border="1"><tr><td>1</td><td>→ 4.3.4</td></tr></table><br>No 2 | 1 | → 4.3.4 |
| 1      | → 4.3.4                                                                                                          |                                                                           |   |         |

form ID =

4.3.2 **[If no:]** Why did you not seek advice or treatment outside the home? **[Circle MAIN reason]**

- |                                          |    |         |
|------------------------------------------|----|---------|
| Health facility/ provider too far        | 1  | → 4.5.1 |
| Had No time                              | 2  | }       |
| Had No money                             | 3  |         |
| Did Not want to attend a health facility | 4  |         |
| Could manage at home                     | 5  |         |
| Spouse did Not allow                     | 6  |         |
| Father's mother did Not allow            | 7  |         |
| Illness was Not severe                   | 8  |         |
| Don't know                               | 99 |         |
| Other (specify):                         | 88 |         |

4.3.3 **[If other:]** Specify: \_\_\_\_\_

skip → 4.5.1

4.3.4 **[If yes:]** Where did you seek advice from? **[multiple answers possible]**

- |                                |    |         |  |
|--------------------------------|----|---------|--|
| <b>PUBLIC SECTOR:</b>          |    |         |  |
| Village health team/CMD        | 1  | → 4.3.6 |  |
| Health centre II               | 2  | }       |  |
| Health centre III              | 3  |         |  |
| Health centre IV               | 4  |         |  |
| Hospital                       | 5  |         |  |
| Clinic/outreach services       | 6  |         |  |
| <b>PRIVATE MEDICAL SECTOR:</b> |    |         |  |
| Pvt. hospital/clinic           | 7  |         |  |
| Pharmacy/drug shop             | 8  |         |  |
| Pvt. doctor                    | 9  |         |  |
| Clinic/outreach services       | 10 |         |  |
| <b>OTHER SOURCE:</b>           |    |         |  |
| General Shop                   | 11 |         |  |
| Traditional practitioner       | 12 |         |  |
| Other                          | 88 |         |  |

4.3.5 **[If other:]** Specify: \_\_\_\_\_

4.3.6 [If only one alternative is circled above: ] SKIP to 4.3.9

4.3.7 [If two or more alternatives are circled above:]  
Where did you first seek advice or treatment?

- PUBLIC SECTOR:
- Village health team/CMD 1 → 4.3.9
  - Health centre II 2
  - Health centre III 3
  - Health centre IV 4
  - Hospital 5
  - Clinic/outreach services 6
- PRIVATE MEDICAL SECTOR:
- Pvt. hospital/clinic 7
  - Pharmacy/drug shop 8
  - Pvt. doctor 9
  - Clinic/outreach services 10
- OTHER SOURCE:
- General Shop 11
  - Traditional practitioner 12
  - Other 88

4.3.8 [If other:] Specify: \_\_\_\_\_

- 4.3.9 How did you get to the first place to seek advice or treatment from?  
[Circle MAIN transport]
- Walking 1 → 4.3.11
  - Bicycling 2
  - Boda Boda (motorbike taxi) 3
  - Taxi (public minibus) 4
  - Bus 5
  - Special hire car 6
  - Lorry 7
  - Boat 8
  - Other 88

4.3.10 [If other:] Specify: text \_\_\_\_\_

4.3.11 How long did it take you to get from home to the first place you sought treatment/advice from? hrs: min  :

4.3.12 In relation to this visit to the first place you sought advice or treatment from:  
Did you spend any money on any of the following? [Fill 0000,000 if no money was spent]

- 4.3.13 Transportation UGX ,   
Dont know = 9999,999
- 4.3.14 Medicines UGX ,   
Dont know = 9999,999
- 4.3.15 Material costs (like gloves, iv, syringes etc) UGX ,   
Dont know = 9999,999
- 4.3.16 Patient registration fees UGX ,   
Dont know = 9999,999
- 4.3.17 Monetary gifts, contributions,gratitudes UGX ,   
Dont know = 9999,999

form ID =

4.3.18 Sustenance costs (e.g. Food, drinks) UGX ,   
Dont know = 9999,999

4.3.19 Other financial expenditure UGX ,   
Dont know = 9999,999

4.3.20 **[If other:]** Specify: text \_\_\_\_\_

4.3.21 **[CHECK Q 4.3.4 : If only one place was mentioned:] SKIP to: 4.4.1**

**[If two or more alternatives circled in Q 4.3.4]**

4.3.22 What was the second place where you did seek advice or treatment?

**PUBLIC SECTOR:**

- Village health team/CMD 1 → 4.3.24
  - Health centre II 2
  - Health centre III 3
  - Health centre IV 4
  - Hospital 5
  - Clinic/outreach services 6
- PRIVATE MEDICAL SECTOR:**
- Pvt. hospital/clinic 7
  - Pharmacy/drug shop 8
  - Pvt. doctor 9
  - Clinic/outreach services 10
- OTHER SOURCE:**
- General Shop 11
  - Traditional practitioner 12
  - Other 88

4.3.23 **[If other:]** Specify: text \_\_\_\_\_

4.3.24 How did you get to the second place where you did seek advice or treatment from?  
**[Circle main transport]**

- Walking 1 → 4.3.26
- Bicycling 2
- Boda Boda (motorbike taxi) 3
- Taxi (public minibus) 4
- Bus 5
- Special hire car 6
- Lorry 7
- Boat 8
- Other 88

4.3.25 **[If other:]** Specify: text \_\_\_\_\_

4.3.26 How long did it take you to get from home to the second place you sought treatment/advice from?  
hrs: min  :

4.3.27 In relation to this visit to the second place you sought advice or treatment from:  
 Did you spend any money on any of the following? **[Fill 0000,000 if no money was spent]**

4.3.28 Transportation UGX ,   
don't know=9999,999

|        |                                                |     |                                                                                     |   |                                                                |
|--------|------------------------------------------------|-----|-------------------------------------------------------------------------------------|---|----------------------------------------------------------------|
| 4.3.29 | Medicines                                      | UGX | <input type="text"/> <input type="text"/> <input type="text"/> <input type="text"/> | , | <input type="text"/> <input type="text"/> <input type="text"/> |
|        |                                                |     | don't know=9999,999                                                                 |   |                                                                |
| 4.3.30 | Material costs (like gloves, iv, syringes etc) | UGX | <input type="text"/> <input type="text"/> <input type="text"/> <input type="text"/> | , | <input type="text"/> <input type="text"/> <input type="text"/> |
|        |                                                |     | Dont know = 9999,999                                                                |   |                                                                |
| 4.3.31 | Patient registration fees                      | UGX | <input type="text"/> <input type="text"/> <input type="text"/> <input type="text"/> | , | <input type="text"/> <input type="text"/> <input type="text"/> |
|        |                                                |     | Dont know = 9999,999                                                                |   |                                                                |
| 4.3.32 | Monetary gifts, contributions,gratitudes       | UGX | <input type="text"/> <input type="text"/> <input type="text"/> <input type="text"/> | , | <input type="text"/> <input type="text"/> <input type="text"/> |
|        |                                                |     | Dont know = 9999,999                                                                |   |                                                                |
| 4.3.33 | Sustenance costs (e.g. Food, drinks)           | UGX | <input type="text"/> <input type="text"/> <input type="text"/> <input type="text"/> | , | <input type="text"/> <input type="text"/> <input type="text"/> |
|        |                                                |     | Dont know = 9999,999                                                                |   |                                                                |
| 4.3.34 | Other financial spenditure                     | UGX | <input type="text"/> <input type="text"/> <input type="text"/> <input type="text"/> | , | <input type="text"/> <input type="text"/> <input type="text"/> |
|        |                                                |     | Dont know = 9999,999                                                                |   |                                                                |
| 4.3.35 | <b>[If other:] Specify:</b>                    |     | _____                                                                               |   |                                                                |

**if not 0000,000** → 4.4.1

4.4.1 Does this community have a VHT?

|            |    |         |
|------------|----|---------|
| Yes        | 1  |         |
| No         | 2  | → 4.4.4 |
| Don't know | 99 |         |

4.4.2 **[If yes, then CHECK answer to Q .3.4 ]**  
**[If yes, and the VHT was mentioned in Q 4.3.4 as a place where advice was sought from: SKIP to Q 4.4.4 ]**

**[If yes, and if the VHT was not mentioned in Q 4.3.4 as a place where advice was sought, then ask:]**

Why did you not visit the Village Health Team ?

|                           |    |         |
|---------------------------|----|---------|
| Don't know the VHT        | 1  | → 4.4.4 |
| VHT Have No drugs         | 2  |         |
| VHT Too expensive         | 3  |         |
| VHT Too far               | 4  |         |
| VHT was Not available     | 5  |         |
| VHT Not good/ don't trust | 6  |         |
| Too busy there            | 7  |         |
| Other:                    | 88 |         |

4.4.3 **[If other:] Specify:** \_\_\_\_\_

4.4.4 How many days after you first saw that the child was ill did you seek advice or treatment?

DAYS

4.4.5 Did anyone count the breathing of the child?  
**[Show respiratory rate timer]**

|            |    |         |
|------------|----|---------|
| Yes        | 1  |         |
| No         | 2  | → 4.4.8 |
| Don't know | 99 |         |

form ID =

4.4.6 **[If Yes:]** Who counted the breaths of the child?

|                             |    |         |
|-----------------------------|----|---------|
| Village health team/CMD     | 1  | → 4.4.8 |
| Staff in Health centre      | 2  |         |
| Staff in Hospital           | 3  |         |
| Staff at Private clinic     | 4  |         |
| Staff at Pharmacy/drug shop | 5  |         |
| Other                       | 88 |         |

4.4.7 **[If other:]** Specify: \_\_\_\_\_

4.4.8 At any time during the illness, did (name) have blood taken from his/her finger or heel for testing?

|            |           |
|------------|-----------|
| Yes        | 1         |
| No         | 2 → 4.5.1 |
| Don't know | 99        |

4.4.9 **[If yes:]** By whom?

|                             |    |          |
|-----------------------------|----|----------|
| Village health team/CMD     | 1  | → 4.4.11 |
| Staff in Health centre      | 2  |          |
| Staff in Hospital           | 3  |          |
| Staff at Private clinic     | 4  |          |
| Staff at Pharmacy/drug shop | 5  |          |
| Other                       | 88 |          |

4.4.10 **[If other:]** Specify: \_\_\_\_\_

4.4.11 Was this test an RDT, like this?  
**[Show RDT]**

|            |    |
|------------|----|
| Yes        | 1  |
| No         | 2  |
| Don't know | 99 |

4.4.12 Was the test positive for malaria?

|            |    |
|------------|----|
| Yes        | 1  |
| No         | 2  |
| Don't know | 99 |

4.5.1 At any time during the illness episode, did (name) take any drugs for the illness?

|            |           |
|------------|-----------|
| Yes        | 1         |
| No         | 2 → 4.7.4 |
| Don't know | 99        |

**If yes, we want to find out which drugs were taken.**

**Probe in this order:**

1. Ask to see balance
2. Ask to see treatment card / prescription
3. Then show the drug posters one by one.

4.5.2 **[Show examples of drugs on card 1 and ask]**

Did (name) receive any of these drugs?

**[Let respondent identify any drugs on this poster]**

|            |           |
|------------|-----------|
| Yes        | 1         |
| No         | 2 → 4.5.4 |
| Don't know | 99        |

4.5.3 **[If yes, circle the code(s): ]** circle

|    |    |    |    |    |    |
|----|----|----|----|----|----|
| D1 | D2 | D3 | D4 | D5 | D6 |
|----|----|----|----|----|----|

4.5.4 [Answer for each of the drugs mentioned below if the respondent has either shown the drug, or a prescription, or identified the drug on the poster. If so, circle YES. Otherwise circle NO. Do not probe]

4.5.5 **ORS (D2)** Yes 1  
No 2

4.5.6 **ZINC (D3)** Yes 1  
No 2

4.5.7 [If the respondent mentioned spontaneously that they used home made ORS, circle Yes for Home-made ORS. Do not probe.]

**Homemade ORS** Yes 1  
No 2

4.5.8 [Show examples of drugs on card 2 and ask:]

Did (name) receive any of these drugs? Yes 1

[Let respondent identify any drugs on this poster]

No 2 → 4.5.10  
Don't know 99

4.5.9 [If yes, circle the code(s): ] circle

|    |    |    |    |    |    |    |    |    |
|----|----|----|----|----|----|----|----|----|
| P1 | P2 | P3 | P4 | P5 | P6 | P7 | P8 | P9 |
|----|----|----|----|----|----|----|----|----|

4.5.10 [Answer for each of the drugs mentioned below if the respondent has either shown the drug, or a prescription, or identified the drug on the poster. If so, circle YES. Otherwise circle NO. Do not probe]

4.5.11 **Amoxycillin (P1 or P2)** Yes 1  
No 2

4.5.12 **Ampicillin (P3)** Yes 1  
No 2 → 4.5.15

4.5.13 *if yes , Ampicillin was taken*, where did you get it from? Village health team/CMD 1 → 4.5.15

Health centre 2

Hospital 3

Private clinic 4

Pharmacy/drug shop 5

Other 88

4.5.14 [If other:] Specify: \_\_\_\_\_

4.5.15 **Cotrimoxazole or Septrin (P4)** Yes 1  
No 2 → 4.5.18

4.5.16 *if yes , Cotrimoxazole or Septrin was taken*, where did you get it from? Village health team/CMD 1 → 4.5.18

Health centre 2

Hospital 3

Private clinic 4

Pharmacy/drug shop 5

Other 88

4.5.17 [If other:] Specify: \_\_\_\_\_

4.5.18 Chloramphenicol (P5)

Yes 1  
No  2 → 4.5.21

4.5.19 *If yes, chloramphenicol was taken*, where did you get it from?

Village health team/CMD  1 → 4.5.21  
Health centre  2  
Hospital  3  
Private clinic  4  
Pharmacy/drug shop  5  
Other  88

4.5.20 [If other:] Specify: \_\_\_\_\_

4.5.21 Erythromycin (P6)

Yes 1  
No  2 → 4.5.24

4.5.22 *If yes, erythromycin was taken*, where did you get it from?

Village health team/CMD  1 → 4.5.24  
Health centre  2  
Hospital  3  
Private clinic  4  
Pharmacy/drug shop  5  
Other  88

4.5.23 [If other:] Specify: \_\_\_\_\_

4.5.24 Azythromycin (P7)

Yes 1  
No  2 → 4.5.27

4.5.25 *if yes, Azythromycin was taken*, where did you get it from?

Village health team/CMD  1 → 4.5.27  
Health centre  2  
Hospital  3  
Private clinic  4  
Pharmacy/drug shop  5  
Other  88

4.5.26 [If other:] Specify: \_\_\_\_\_

4.5.27 Pen V (P8)

Yes 1  
No  2 → 4.5.30

4.5.28 *if yes, Pen V was taken*, where did you get it from?

Village health team/CMD  1 → 4.5.30  
Health centre  2  
Hospital  3  
Private clinic  4  
Pharmacy/drug shop  5  
Other  88

4.5.29 [If other:] Specify: \_\_\_\_\_

4.5.30 **Cephalexin (P9)**

Yes 1  
No 2 → 4.5.33

4.5.31 **if yes , Cephalexin was taken**, where did you get it from?

Village health team/CMD 1 → 4.5.33  
Health centre 2  
Hospital 3  
Private clinic 4  
Pharmacy/drug shop 5  
Other 88

4.5.32 **[If other:] Specify:** \_\_\_\_\_

4.5.33 **[Show examples of drugs on card 3 and ask:]**

Did (name) receive any of these drugs?

**[Let respondent identify any drugs on this poster]**

Yes 1  
No 2 → 4.5.35  
Don't know 99

4.5.34 **[If yes, circle the code(s): ]** circle

|    |    |    |    |     |
|----|----|----|----|-----|
| M1 | M2 | M3 | M4 | M5  |
| M6 | M7 | M8 | M9 | M10 |

**[Answer for each of the drugs mentioned below if the respondent has either shown the drug, or a prescription, or identified the drug on the poster. If so, circle YES. Otherwise circle NO. Do not probe]**

4.5.35 **Coartem**, Artemether-Lumefantrine (M1)

Yes 1  
No 2

4.5.36 **Duo-Cotecxin (M2)**

Yes 1  
No 2 → 4.5.39

4.5.37 **if yes , Duo-Cotecxin was taken**, where did you get it from?

Village health team/CMD 1 → 4.5.39  
Health centre 2  
Hospital 3  
Private clinic 4  
Pharmacy/drug shop 5  
Other 88

4.5.38 **[If other:] Specify:** \_\_\_\_\_

4.5.39 **Rectal Artesunate/ Artesam (M3)** Yes 1  
 No  2 → 4.5.42

4.5.40 **if yes , Rectal Artesunate/ Artesam was taken**, where did you get it from? Village health team/CMD  1 → 4.5.42  
 Health centre  2  
 Hospital  3  
 Private clinic  4  
 Pharmacy/drug shop  5  
 Other  88

4.5.41 [If other:] Specify: \_\_\_\_\_

4.5.42 **Artemether (M4)** Yes 1  
 No  2 → 4.5.45

4.5.43 **if yes , Artemether was taken**, where did you get it from? Village health team/CMD  1 → 4.5.45  
 Health centre  2  
 Hospital  3  
 Private clinic  4  
 Pharmacy/drug shop  5  
 Other  88

4.5.44 [If other:] Specify: \_\_\_\_\_

4.5.45 **Fansidar or SP (M5)** Yes 1  
 No  2 → 4.5.48

4.5.46 **if yes , Fansidar or SP was taken**, where did you get it from? Village health team/CMD  1 → 4.5.48  
 Health centre  2  
 Hospital  3  
 Private clinic  4  
 Pharmacy/drug shop  5  
 Other  88

4.5.47 [If other:] Specify: \_\_\_\_\_

4.5.48 **Amodiaquine (M6)** Yes 1  
 No  2 → 4.5.51

4.5.49 **if yes , Amodiaquine was taken**, where did you get it from? Village health team/CMD  1 → 4.5.51  
 Health centre  2  
 Hospital  3  
 Private clinic  4  
 Pharmacy/drug shop  5  
 Other  88

4.5.50 [If other:] Specify: \_\_\_\_\_

4.5.51 **Amodiaquin - Artesunate (or Artesunate-Amodiaquine) (M7)** Yes 1  
 No 2 → 4.5.54

4.5.52 **if yes , Artesunate -Amodiaquine was taken**, where did you get it from? Village health team/CMD 1 → 4.5.54  
 Health centre 2  
 Hospital 3  
 Private clinic 4  
 Pharmacy/drug shop 5  
 Other 88

4.5.53 [If other:] Specify: \_\_\_\_\_

4.5.54 **Quinine (M8)** Yes 1  
 No 2 → 4.5.57

4.5.55 **if yes , Quinine was taken**, where did you get it from? Village health team/CMD 1 → 4.5.57  
 Health centre 2  
 Hospital 3  
 Private clinic 4  
 Pharmacy/drug shop 5  
 Other 88

4.5.56 [If other:] Specify: \_\_\_\_\_

4.5.57 **Chloroquine (M9)** Yes 1  
 No 2 → 4.5.60

4.5.58 **if yes , Chloroquine was taken**, where did you get it from? Village health team/CMD 1 → 4.5.60  
 Health centre 2  
 Hospital 3  
 Private clinic 4  
 Pharmacy/drug shop 5  
 Other 88

4.5.59 [If other:] Specify: \_\_\_\_\_

4.5.60 **Artesunate (M10)** Yes 1  
 No 2 → 4.5.63

4.5.61 **if yes , Artesunate -Fansidar was taken**, where did you get it from? Village health team/CMD 1 → 4.5.63  
 Health centre 2  
 Hospital 3  
 Private clinic 4  
 Pharmacy/drug shop 5  
 Other 88

4.5.62 [If other:] Specify: \_\_\_\_\_

4.5.63 **Artesunate -Fansidar** Yes 1  
 No 2 → 4.6.1

4.5.64 **if yes , Artesunate -Fansidar was taken**, where did you get it from?  
 Village health team/CMD 1 → 4.6.1  
 Health centre 2  
 Hospital 3  
 Private clinic 4  
 Pharmacy/drug shop 5  
 Other 88

4.5.65 [If other:] Specify: \_\_\_\_\_

**[CHECK answer to Q 4.5.5. Was ORS one of the drugs taken?]**

4.6.1 Where did you get the **ORS** from ?  
 Not applicable, did Not take ORS 77 → 4.6.7  
 Village health team/CMD 1 → 4.6.3  
 Health centre II 2  
 Health centre III 3  
 Health centre IV 4  
 Hospital 5  
 Clinic/outreach services 6  
**PRIVATE MEDICAL SECTOR:**  
 Pvt. hospital/clinic 7  
 Pharmacy/drug shop 8  
 Pvt. doctor 9  
 Clinic/outreach services 10  
**OTHER SOURCE:**  
 General Shop 11  
 Traditional practitioner 12  
 Other 88

4.6.2 [If other:] Specify: \_\_\_\_\_

4.6.3 How many days after you first saw that (name) was ill did (name) first take ORS?  
 Same day 0  
 One day after 1  
 2 days after 2  
 Three or more days after 3  
 Don't know 99

4.6.4 For how many days did (name) take **ORS**?

4.6.5 What dose of **ORS** was (name) prescribed to take ?

- 1 sachet in 2 cups of water  1 → 4.6.7
- 1 sachet in 1 cup of water  2
- Other 88
- Don't know  99 → 4.6.7

4.6.6 **[If other:]** Specify: \_\_\_\_\_

**[CHECK answer to Q 4.5.6. Was ZINC one of the drugs taken?]**

4.6.7 Where did you get the **ZINC** from ?

- Not applicable, did Not take ZINC  77 → 4.6.15
- Village health team/CMD  1 → 4.6.9
- Health centre II  2
- Health centre III  3
- Health centre IV  4
- Hospital  5
- Clinic/outreach services  6
- PRIVATE MEDICAL SECTOR:
- Pvt. hospital/clinic  7
- Pharmacy/drug shop  8
- Pvt. doctor  9
- Clinic/outreach services  10
- OTHER SOURCE:
- General Shop  11
- Traditional practitioner  12
- Other 88

4.6.8 **[If other:]** Specify: \_\_\_\_\_

4.6.9 How many days after you first saw that (name) was ill did (name) first take ZINC?

- Same day 0
- One day after 1
- 2 days after 2
- Three or more days after 3
- Don't know 99

4.6.10 For how many days did (name) take **ZINC**?  number

form ID =

4.6.11 How many times a day did (name) take **ZINC**?

- Once a day 1 → 4.6.13
- Two Times a day 2
- Three Times a Day 3
- More than three times a day 4
- Other 88
- Don't know 99 → 4.6.13

4.6.12 [If other:] Specify: \_\_\_\_\_

4.6.13 What dose of **ZINC** was (name) prescribed to take ?

- Half a tablet 1 → 4.6.15
- One tablet 2
- More than 1 tablet 3
- Other 88
- Don't know 99 → 4.6.15

4.6.14 [If other:] Specify: \_\_\_\_\_

**[CHECK answer to Q 4.5.11. Was AMOXYCILLIN one of the drugs taken?]**

4.6.15 Where did you get the **AMOXYCILLIN** from ?

- Not applicable, did Not take AMOXYCILLIN 77 → 4.6.23
- Village health team/CMD 1 → 4.6.17
- Health centre II 2
- Health centre III 3
- Health centre IV 4
- Hospital 5
- Clinic/outreach services 6
- PRIVATE MEDICAL SECTOR:
- Pvt. hospital/clinic 7
- Pharmacy/drug shop 8
- Pvt. doctor 9
- Clinic/outreach services 10
- OTHER SOURCE:
- General Shop 11
- Traditional practitioner 12
- Other 88

4.6.16 [If other:] Specify: \_\_\_\_\_

4.6.17 How many days after you first saw that (name) was ill did (name) first take: **AMOXYCILLIN**?

- Same day 0
- One day after 1
- 2 days after 2
- Three or more days after 3
- Don't know 99

4.6.18 For how many days did (name) take **AMOXYCILLIN**?

4.6.19 How many times a day did (name) take **AMOXYCILLIN**?

|                             |    |          |
|-----------------------------|----|----------|
| Once a day                  | 1  | → 4.6.21 |
| Two Times a day             | 2  | }        |
| Three Times a Day           | 3  |          |
| More than three times a day | 4  |          |
| Other                       | 88 |          |
| Don't know                  | 99 | → 4.6.21 |

4.6.20 [If other:] Specify: \_\_\_\_\_

4.6.21 What dose of **AMOXYCILLIN** was (name) prescribed to take ?

|                                 |    |          |
|---------------------------------|----|----------|
| 1 tablet or capsule             | 1  | → 4.6.23 |
| 2 tablets or capsules           | 2  | }        |
| More than 2 tablets or capsules | 3  |          |
| Other                           | 88 |          |
| Don't know                      | 99 | → 4.6.23 |

4.6.22 [If other:] Specify: \_\_\_\_\_

**[CHECK answer to Q 4.5.35. Was COARTEM one of the drugs taken?]**

4.6.23 Where did you get the **Coartem** from ?

|                                      |    |          |
|--------------------------------------|----|----------|
| Not applicable, did Not take COARTEM | 77 | → 4.7.1  |
| Village health team/CMD              | 1  | → 4.6.25 |
| Health centre II                     | 2  | }        |
| Health centre III                    | 3  |          |
| Health centre IV                     | 4  |          |
| Hospital                             | 5  |          |
| Clinic/outreach services             | 6  |          |
| PRIVATE MEDICAL SECTOR:              |    |          |
| Pvt. hospital/clinic                 | 7  |          |
| Pharmacy/drug shop                   | 8  |          |
| Pvt. doctor                          | 9  |          |
| Clinic/outreach services             | 10 |          |
| OTHER SOURCE:                        |    |          |
| General Shop                         | 11 |          |
| Traditional practitioner             | 12 |          |
| Other                                | 88 |          |

4.6.24 [If other:] Specify: \_\_\_\_\_

4.6.25 How many days after you first saw that (name) was ill did (name) first take **COARTEM**?

|                          |    |
|--------------------------|----|
| Same day                 | 0  |
| One day after            | 1  |
| 2 days after             | 2  |
| Three or more days after | 3  |
| Don't know               | 99 |

4.6.26 For how many days did (name) take **COARTEM**?

4.6.27 How many times a day did (name) take **COARTEM**?

- Once a day 1 → 4.6.29
- Two Times a day 2
- Three Times a Day 3
- More than three times a day 4
- Other 88
- Don't know 99 → 4.6.29

4.6.28 [If other:] Specify: \_\_\_\_\_

4.6.29 What dose of **COARTEM** was (name) prescribed to take ?

- Half a tablet 1 → 4.7.1
- One tablet 2
- Two tablets 3
- More than 2 tablets 4
- Other, 88
- Don't know 99 → 4.7.1

4.6.30 [If other:] Specify: \_\_\_\_\_

4.7.1 [Ask for any of the drugs given: ]

Did you give the treatment according to the instructions you were given (in terms of doses and frequency and number of days) by the health provider/ VHT?

- Yes 1 → 4.7.4
- No 2
- Don't know 99 → 4.7.4

4.7.2 If no, why did you not give the treatment according to the instructions that you were given by the health provider/VHT?

- The child vomited 1 → 4.7.4
- The medicine had a bad taste 2
- The child developed a rash 3
- The child developed diarrhoea 4
- The child got cured 5
- The child did Not improve 6
- I forgot 7
- Duration of treatment was too long 8
- Other 88

4.7.3 [If other:] Specify: \_\_\_\_\_

4.7.4 [CHECK with section 3 whether there are more children who were sick in the past two weeks.]

- Yes 1 → 4.7.5
- No 2 → 4.7.6

4.7.5 [If yes: fill out the "ADDITIONAL CHILD FORM" now]

4.7.6 [If no: continue to section 5.]

Questions regarding **ZINC**

[**CHECK** answer to question..... 4.5.6 ]

- 5.1 [Don't ask but fill:] Was **ZINC** taken? Yes 1 → 5.4  
No 2
- 5.2 Have you heard of a product called **ZINC**? Yes 1  
No 2 → 5.9  
Don't know 99
- 5.3 [If yes, the respondent has either mentioned **ZINC** before, or has heard of **ZINC**, ask:]  
Do you agree or disagree with the following statements:
- 5.4 **ZINC** is an effective treatment for diarrhoea. Strongly agree 1  
Somewhat agree 2  
Somewhat disagree 3  
Strongly disagree 4  
Don't know 99
- 5.5 **ZINC** strengthens the child. Strongly agree 1  
Somewhat agree 2  
Somewhat disagree 3  
Strongly disagree 4  
Don't know 99
- 5.6 **ZINC** should be taken with ORS. Strongly agree 1  
Somewhat agree 2  
Somewhat disagree 3  
Strongly disagree 4  
Don't know 99
- 5.7 **ZINC** prevents diarrhoea. Strongly agree 1  
Somewhat agree 2  
Somewhat disagree 3  
Strongly disagree 4  
Don't know 99
- 5.8 **ZINC** reduces diarrhoea. Strongly agree 1  
Somewhat agree 2  
Somewhat disagree 3  
Strongly disagree 4  
Don't know 99

Questions regarding AMOXYCILLIN

- [CHECK** answer to question: ..... **4.5.11 ]**  
**[Don't ask but fill:]** Was **AMOXYCILLIN** taken? Yes  1 → 5.11  
 No  2
- 5.10 Have you heard of a product called **AMOXYCILLIN**? Yes 1  
 No  2 → S6  
 Don't know  99
- 5.11 **[ If yes, the respondent has either mentioned AMOXYCILLIN before, or has heard of AMOXYCILLIN, ask:]**
- 5.12 Would you give **AMOXYCILLIN** to your child if the child had: Cough and a stuffy nose without fever or fast breathing? Yes 1  
 No 2  
 Don't know 99
- 5.13 Cough and a stuffy nose and fever? Yes 1  
 No 2  
 Don't know 99
- 5.14 Cough and fast breathing? Yes 1  
 No 2  
 Don't know 99
- 5.15 In any other situation? Yes 1  
 No  2 → 5.17
- 5.16 **[If other:]** Specify \_\_\_\_\_
- 5.17 Do you agree or disagree with the following statement about **AMOXYCILLIN**:  
**Amoxycillin** is an effective treatment for pneumonia. Strongly agree 1  
 Somewhat agree 2  
 Somewhat disagree 3  
 Strongly disagree 4  
 Don't know 99

S6 SECTION 6: VHT VISITS AND PREVENTIVE HEALTH BEHAVIORS

**[CHECK section 4, Q 4.4.1: If the respondent did report any sick children in the past two weeks, then you have already asked question 6.1 , JUST FILL 6.1 and then continue to Q 6.2]**

6.1 Does this community have a VHT? Yes 1  
 Note VHT= "the ones who give out drugs for children" No 2 → 6.4  
 Don't know 99

6.2 If yes, Was your household visited by a VHT in the last month? Yes 1  
 No 2 → 6.4  
 Don't know 99

6.3 What did the VHT do during this visit?  
 Ask about the vaccinations of my child/children Yes 1  
 No 2  
 Kept record of health in my family Yes 1  
 No 2  
 Gave advice about healthy habits Yes 1  
 No 2  
 Asked or Observed health behaviour, practices, hygiene, and health condition of household members Yes 1  
 No 2

6.4 **[CHECK with section 3: Are there any children under age of 2 months: ]** Yes 1  
 No 2 → S7

**[Continue this section only if you speak , or can speak, to the MOTHER of the child. If you can not, then SKIP to: S 7**

6.5 Did you see anyone for antenatal care during this pregnancy? Yes 1  
 No 2 → 6.8  
 Don't know 99

6.6 How many months pregnant were you when you first received antenatal care for this pregnancy? DONT Know =99

6.7 How many times did you receive antenatal care during this pregnancy? DONT Know =99

6.8 Where did you deliver your baby?  
 At home 1 → 6.9  
 At the TBA's home 2  
 Health centre 3  
 Private clinic 4  
 Hospital 5  
 At a midwife's /maternity home 6  
 Other 88

6.8.1 **[If other:] Specify** \_\_\_\_\_

6.9 **[CHECK Q 6.1 : If there is no VHT in this village : SKIP to** 6.14

6.10 Were you visited by a VHT in the first week of (name)'s life? Yes 1  
 No 2 → 6.14  
 Don't know 99

6.11 How many times were you visited in the first week ?

DON'T Know =99

6.12 How long after delivery did the VHT first visit you?

- On day of birth 1
- On the second day 2
- On the third day 3
- On the fourth day 4
- On the fifth day 5
- On the sixth 6
- On the seventh day 7

6.13 Did the VHT look at (name)'s health?

- Yes 1
- No 2
- Don't know 99

6.14 **[SAY:] Now I would like to ask you some questions about how (name) was taken care of right after it was born.**

6.15 Was anything ever applied to (name)'s cord?

- Yes 1
- No  2 → 6.18
- Don't know  99

6.16 **[If Yes:]** What was applied to the cord?

- Medical drugs  1 → 6.18
- Baby Powder 2
- Ash 3
- Salty water 4
- Cow dung 5
- Spirit 6
- Herbs 7
- Other 88

6.17 **[If other:]** Specify \_\_\_\_\_

6.18 Was (name) wiped (dried) as soon as she/he was born?

- Yes 1
- No  2 → 6.20
- Don't know  99

6.19 **[If Yes:]** How soon after birth was (name) wiped (dried)?

- Baby was not wiped/dried at all 1
- Within 15 minutes after birth 2
- After 15 but within 30 minutes 3
- After 30 but within 60 minutes 4
- Between 1 and 3 hours 5
- After three hours 6

6.20 How long after birth did you first put (name) to the breast?

- Baby is Not breast fed at all 1
- Within one hour 2
- After one hour, but within three hours 3
- After three hours but within 12 hours 4
- After 12 but within 24 hours 5
- After 24 hours 6
- Don't know 99

Regardless of previous answers about VHTS, in this section we want to know whether respondent has heard about VHTS, and if yes, how?

7 Ask: SINCE NEW YEAR have you:

7.1 Heard about VHTs on radio? Yes 1  
No 2

7.2 Seen anything about VHTs on television? Yes 1  
No 2

7.3 Read about VHTs in a newspaper or magazine? Yes 1  
No 2

7.4 Heard about a VHTs by word of mouth? Yes 1  
No 2

**This was the last question in the questionnaire. SAY**

***“ This is now almost the end of the interview”***

***“Before I leave you, I would like to make some observations of this compound. This is also part of our study”***

***“Thank you very much for taking part in this survey. Do you have any questions you wanted to ask me?”***

S8 **Section 8. COMPOUND OBSERVATION**

**The following questions need to be answered at the end of the entire interview before you leave for the next household**

**Question**

- 8.1 **[Observe:]** Can you easily see a washing basin/bowl/jerry can? Yes 1  
No 2
- 8.2 **[Observe:]** Can you easily see soap for handwashing? Yes 1  
No 2
- 8.3 **[Observe or Ask:]** What kind of toilet facility do members of your household usually use?
- |                          |    |       |
|--------------------------|----|-------|
| Flush toilet (sink tank) | 1  | → 8.5 |
| VIP latrine              | 2  |       |
| Ecosan                   | 3  |       |
| Pit latrine              | 4  |       |
| Shared/public toilet     | 5  |       |
| No facility(/bush/field) | 6  |       |
| Other                    | 88 |       |
- 8.4 **[If other:]** Specify \_\_\_\_\_
- 8.5 **[Observe:]** What is the **MAIN** material the roof is made of?  
**[Majority of roof]**
- |                            |    |       |
|----------------------------|----|-------|
| Thatch                     | 1  | → 8.7 |
| Mud/clay                   | 2  |       |
| Grass/papyrus/banana leaf  | 3  |       |
| <b>FINISHED:</b>           |    |       |
| Wood planks                | 4  |       |
| Iron/zinc/aluminium sheets | 5  |       |
| Asbestos                   | 6  |       |
| Tiles                      | 7  |       |
| Tin                        | 8  |       |
| Cement                     | 9  |       |
| Other                      | 88 |       |
- 8.6 **[If other:]** Specify \_\_\_\_\_

8.7 **[Observe and record:]** What is the **MAIN** material the walls are made of?  
**[Majority of walls]**

**NATURAL:**

Reed 1 → 8.9

Grass 2

**RUDIMENTARY:**

Mud 3

unburned Bricks 4

**FINISHED:**

burned bricks 5

Unplastered cement 6

Plastered cement 7

Stone 8

Wood 9

Other 88

8.8 **[If other:]** Specify \_\_\_\_\_

8.9 **[Observe and record:]** What is the material the window frames are made of?  
**[Majority of windows]**

Reed 1 → 8.11

Wood 2

Open space without curtains 3

Open space with curtains 4

Aluminium/steel 5

No windows 6

Other 88

8.10 **[If other:]** Specify \_\_\_\_\_

8.11 **[Observe and record:]** What is the **MAIN** material the floors are made of?

**NATURAL:**

Sand/gravel 1 → 8.13

Earth 2

Earth and cowdung 3

**FINISHED:**

Wood / Planks 4

Cement 5

Other 88

8.12 **[If other:]** Specify \_\_\_\_\_

**[Use your GPS to identify the coordinates of this compound:]**

8.13 Coordinates of compound NORTH °  " N

8.14 Coordinates of compound EAST °  " E

exit **This is the end of your work with this household**  
**Thank the family again before moving to the next household**
